# Supplementary material for: New Phragmalin-Type Limonoids from Chukrasia tabularis and Their α-Glucosidase Inhibitory Activity
Source: MDPI journal article supplement (doi:10.3390/molecules21010058), 2016-01-05
Supplement: s1 [file s1]

# Supplementary Materials: New Phragmalin-Type Limonoids from *Chukrasia tabularis* and Their $\alpha$ -Glucosidase Inhibitory Activity

Jun-Lin Peng, Jun Wang, Fan-Dong Kong, Zi-Qi Liu, Pei Wang, Bei Jiang, Cui-Juan Gai, Wen-Li Mei and Hao-Fu Dai

## Contents

- Figure S1.**  $^1\text{H}$ -NMR (500 MHz) spectrum of the new compound **1** in  $\text{CDCl}_3$ .
- Figure S2.**  $^{13}\text{C}$ -NMR (125 MHz) and DEPT NMR spectrum of the new compound **1** in  $\text{CDCl}_3$ .
- Figure S3.** HSQC spectrum of the new compound **1** in  $\text{CDCl}_3$ .
- Figure S4.**  $^1\text{H}$ - $^1\text{H}$  COSY spectrum of the new compound **1** in  $\text{CDCl}_3$ .
- Figure S5.** HMBC spectrum of the new compound **1** in  $\text{CDCl}_3$ .
- Figure S6.** ROESY spectrum of the new compound **1** in  $\text{CDCl}_3$ .
- Figure S7.** Partial enlarged ROESY spectra of compound **1** in  $\text{CDCl}_3$ .
- Figure S8.**  $^1\text{H}$ -NMR (500 MHz) spectrum of the new compound **2** in  $\text{CDCl}_3$ .
- Figure S9.**  $^{13}\text{C}$ -NMR (125 MHz) and DEPT NMR spectrum of the new compound **2** in  $\text{CDCl}_3$ .
- Figure S10.** HSQC spectrum of the new compound **2** in  $\text{CDCl}_3$ .
- Figure S11.**  $^1\text{H}$ - $^1\text{H}$  COSY spectrum of the new compound **2** in  $\text{CDCl}_3$ .
- Figure S12.** HMBC spectrum of the new compound **2** in  $\text{CDCl}_3$ .
- Figure S13.** ROESY spectrum of the new compound **2** in  $\text{CDCl}_3$ .
- Figure S14.** Partial enlarged ROESY spectra of compound **2** in  $\text{CDCl}_3$ .
- Figure S15.**  $^1\text{H}$ -NMR (500 MHz) spectrum of the new compound **3** in  $\text{CDCl}_3$ .
- Figure S16.**  $^{13}\text{C}$ -NMR (125 MHz) and DEPT NMR spectrum of the new compound **3** in  $\text{CDCl}_3$ .
- Figure S17.** HSQC spectrum of the new compound **3** in  $\text{CDCl}_3$ .
- Figure S18.**  $^1\text{H}$ - $^1\text{H}$  COSY spectrum of the new compound **3** in  $\text{CDCl}_3$ .
- Figure S18.** HMBC spectrum of the new compound **3** in  $\text{CDCl}_3$ .
- Figure S20.** ROESY spectrum of the new compound **3** in  $\text{CDCl}_3$ .
- Figure S21.** Partial enlarged ROESY spectra of compound **3** in  $\text{CDCl}_3$ .
- Figure S22.**  $^1\text{H}$ -NMR (500 MHz) spectrum of the new compound **4** in  $\text{CDCl}_3$ .
- Figure S23.**  $^{13}\text{C}$ -NMR (125 MHz) and DEPT NMR spectrum of the new compound **4** in  $\text{CDCl}_3$ .
- Figure S24.** HSQC spectrum of the new compound **4** in  $\text{CDCl}_3$ .
- Figure S25.**  $^1\text{H}$ - $^1\text{H}$  COSY spectrum of the new compound **4** in  $\text{CDCl}_3$ .
- Figure S26.** HMBC spectrum of the new compound **4** in  $\text{CDCl}_3$ .
- Figure S27.** ROESY spectrum of the new compound **4** in  $\text{CDCl}_3$ .
- Figure S28.** Partial enlarged ROESY spectra of compound **4** in  $\text{CDCl}_3$ .

**Figure S29.**  $^1\text{H}$ -NMR (500 MHz) spectrum of the new compound **5** in  $\text{CDCl}_3$ .

**Figure S30.**  $^{13}\text{C}$ -NMR (125 MHz) and DEPT NMR spectrum of the new compound **5** in  $\text{CDCl}_3$ .

**Figure S31.** HSQC spectrum of the new compound **5** in  $\text{CDCl}_3$ .

**Figure S32.**  $^1\text{H}$ - $^1\text{H}$  COSY spectrum of the new compound **5** in  $\text{CDCl}_3$ .

**Figure S33.** HMBC spectrum of the new compound **5** in  $\text{CDCl}_3$ .

**Figure S34.** ROESY spectrum of the new compound **5** in  $\text{CDCl}_3$ .

**Figure S35.** Partial enlarged ROESY spectra of compound **5** in  $\text{CDCl}_3$ .

**Figure S36.** HR-ESI-MS spectrum of the new compound **1**.

**Figure S37.** HR-ESI-MS spectrum of the new compound **2**.

**Figure S38.** HR-ESI-MS spectrum of the new compound **3**.

**Figure S39.** HR-ESI-MS spectrum of the new compound **4**.

**Figure S40.** HR-ESI-MS spectrum of the new compound **5**.

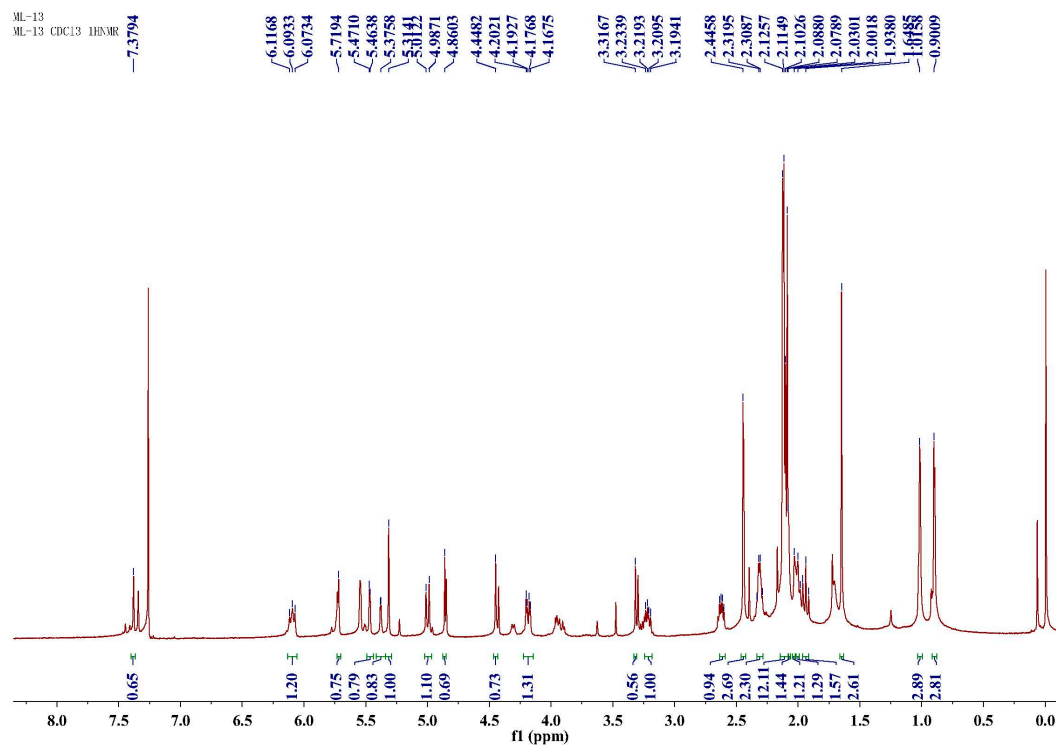

**Figure S1.**  $^1\text{H}$ -NMR (500 MHz) spectrum of the new compound **1** in  $\text{CDCl}_3$ .

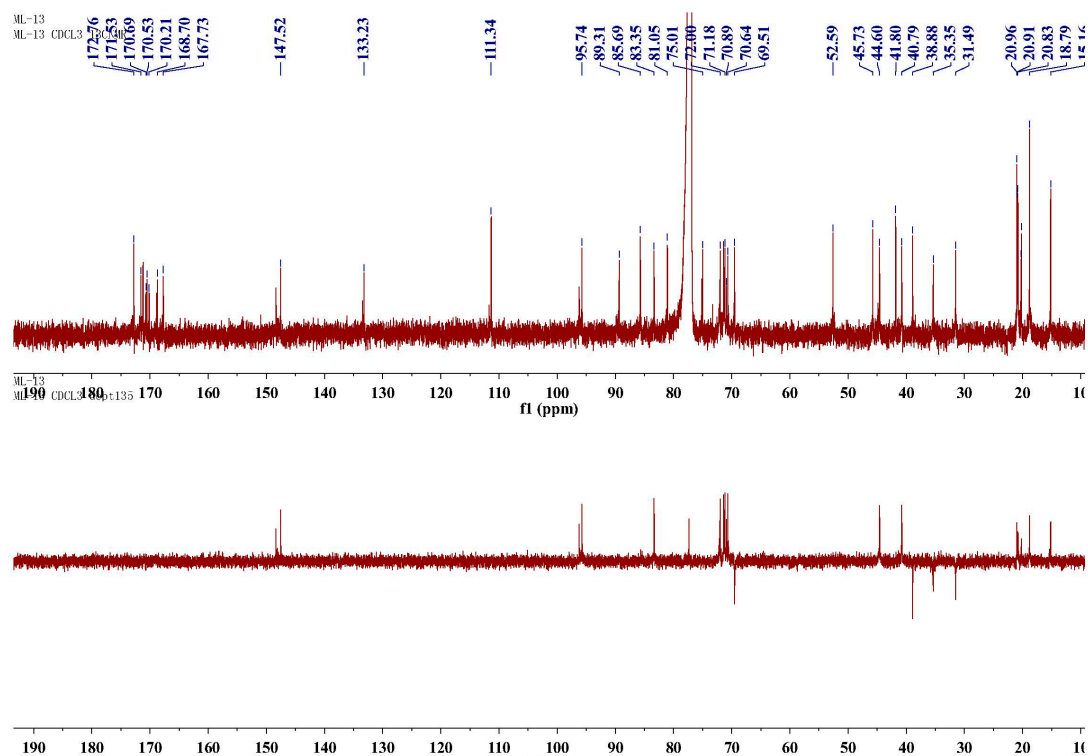

Figure S2.  $^{13}\text{C}$ -NMR (125 MHz) and DEPT NMR spectrum of the new compound **1** in  $\text{CDCl}_3$ .

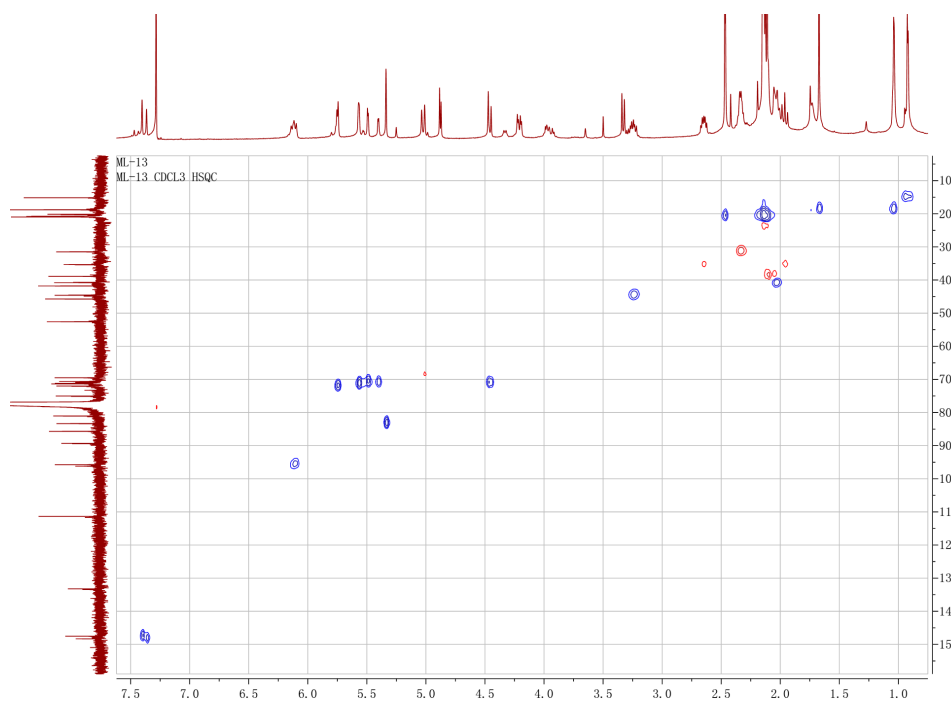

Figure S3. HSQC spectrum of the new compound **1** in  $\text{CDCl}_3$ .

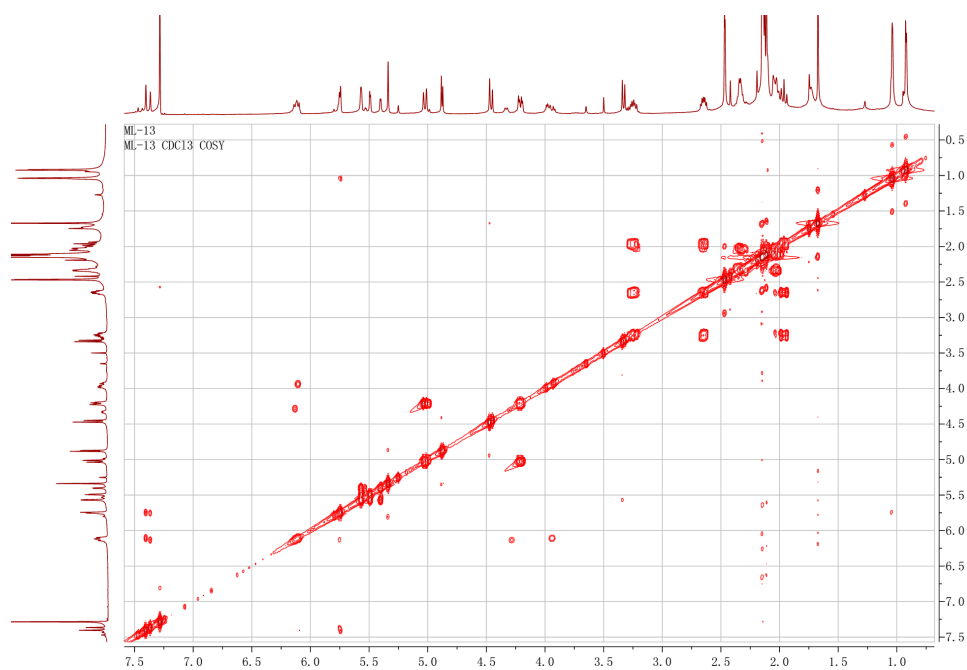

**Figure S4.**  $^1\text{H}$ - $^1\text{H}$  COSY spectrum of the new compound **1** in  $\text{CDCl}_3$ .

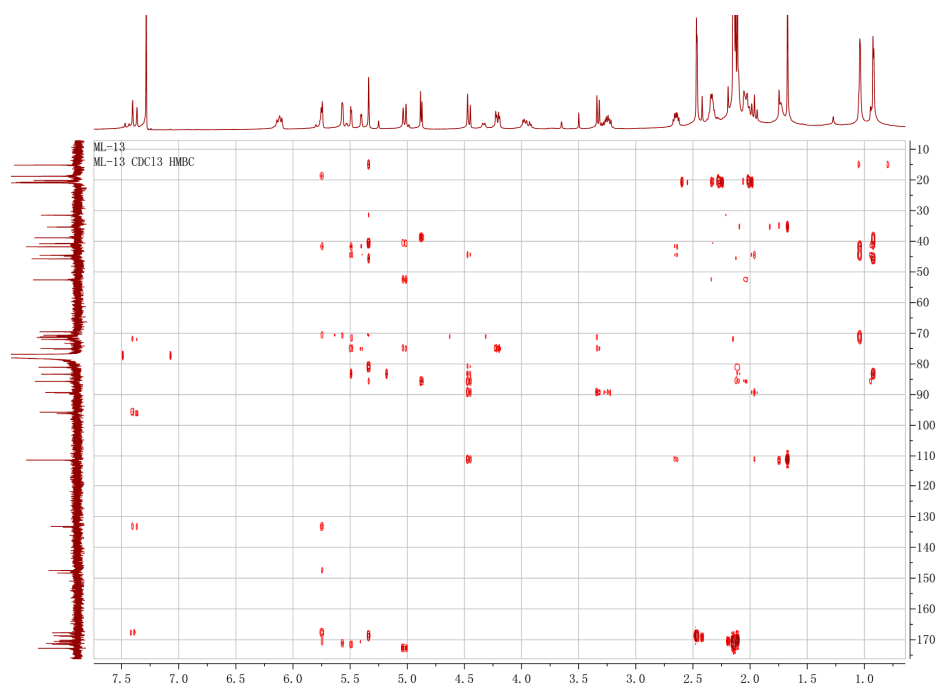

**Figure S5.** HMBC spectrum of the new compound **1** in  $\text{CDCl}_3$ .



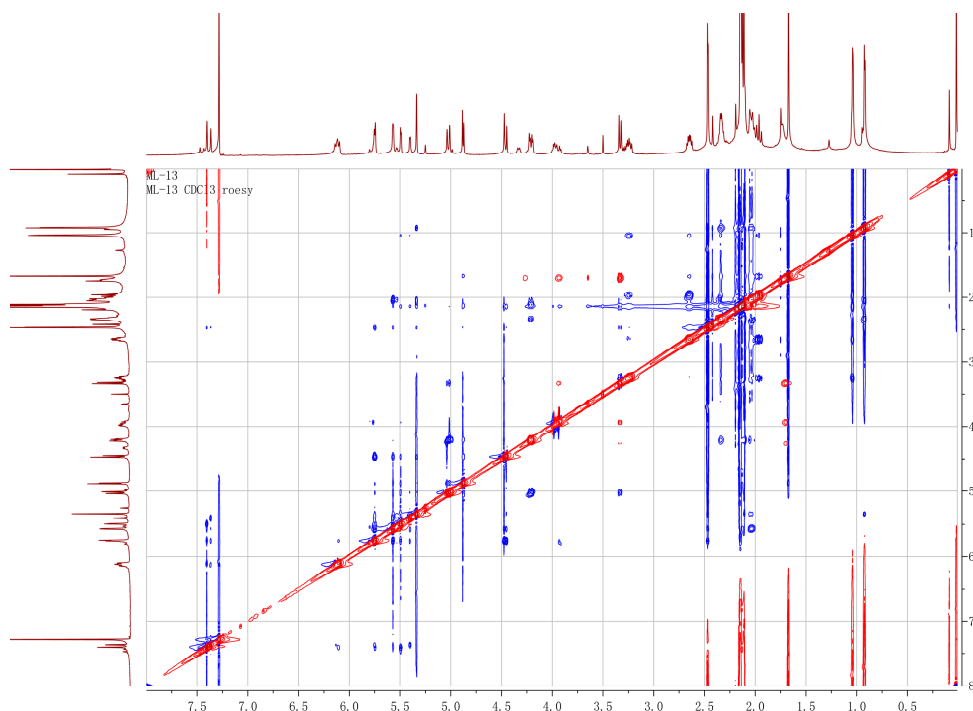

Figure S6. ROESY spectrum of the new compound 1 in CDCl<sub>3</sub>.

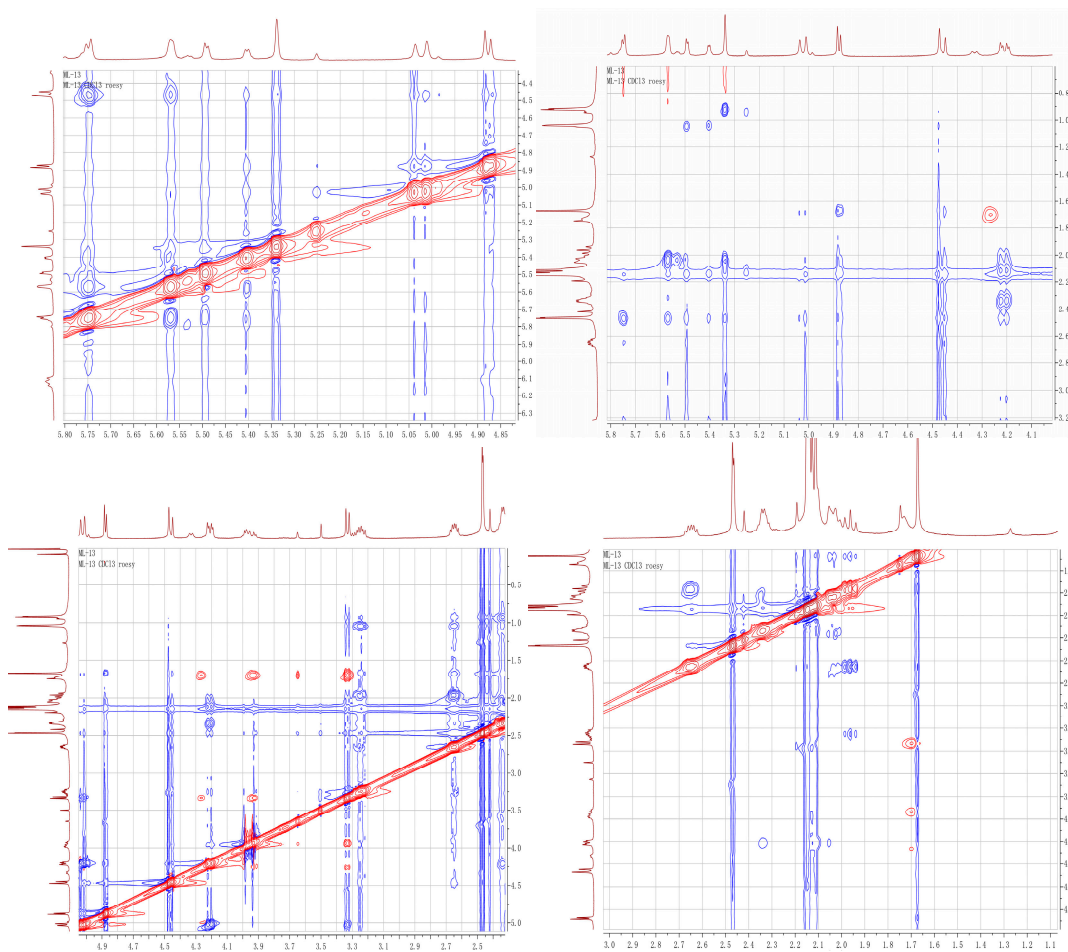

Figure S7. Cont.

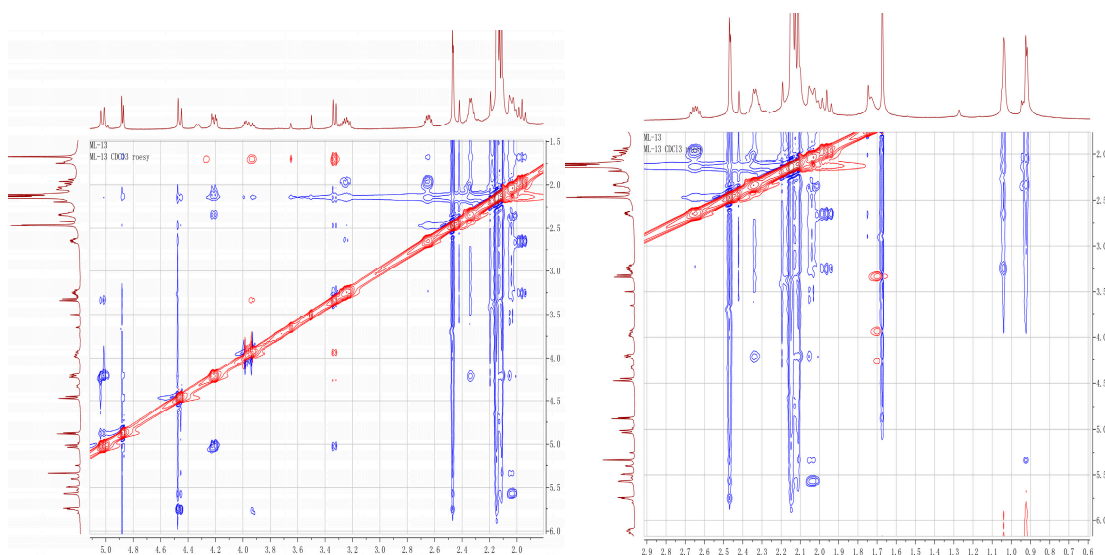

Figure S7. Partial enlarged ROESY spectra of compound **1** in CDCl<sub>3</sub>.

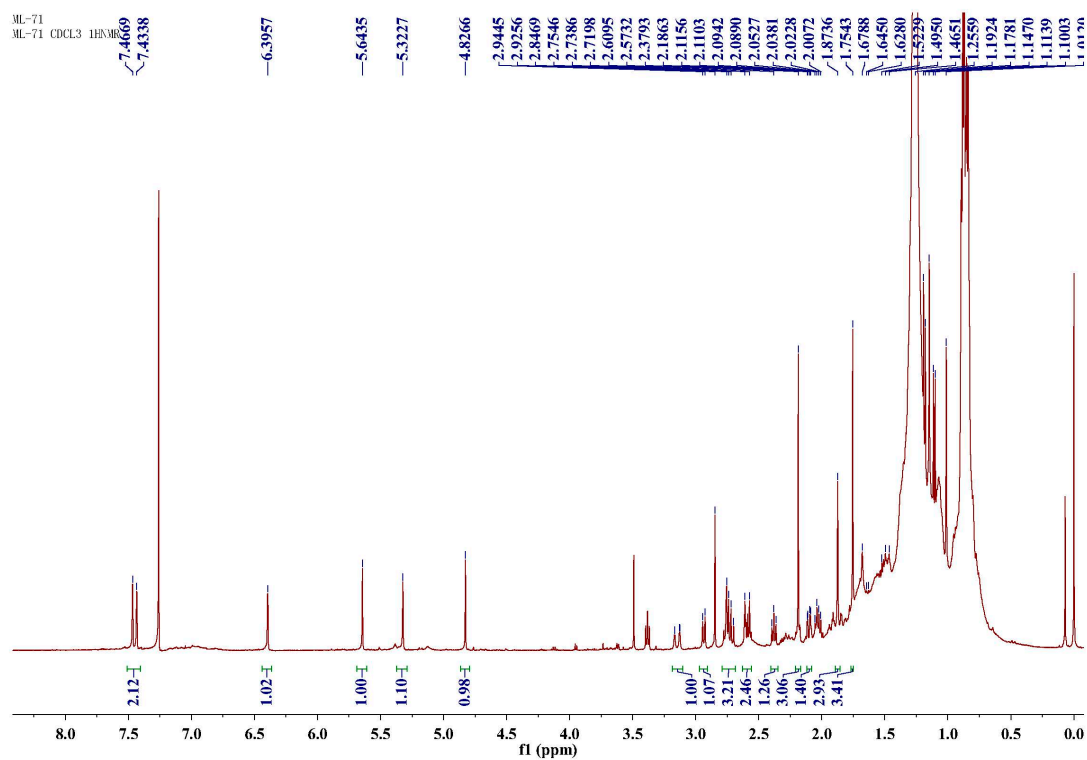

Figure S8. <sup>1</sup>H-NMR (500 MHz) spectrum of the new compound **2** in CDCl<sub>3</sub>.

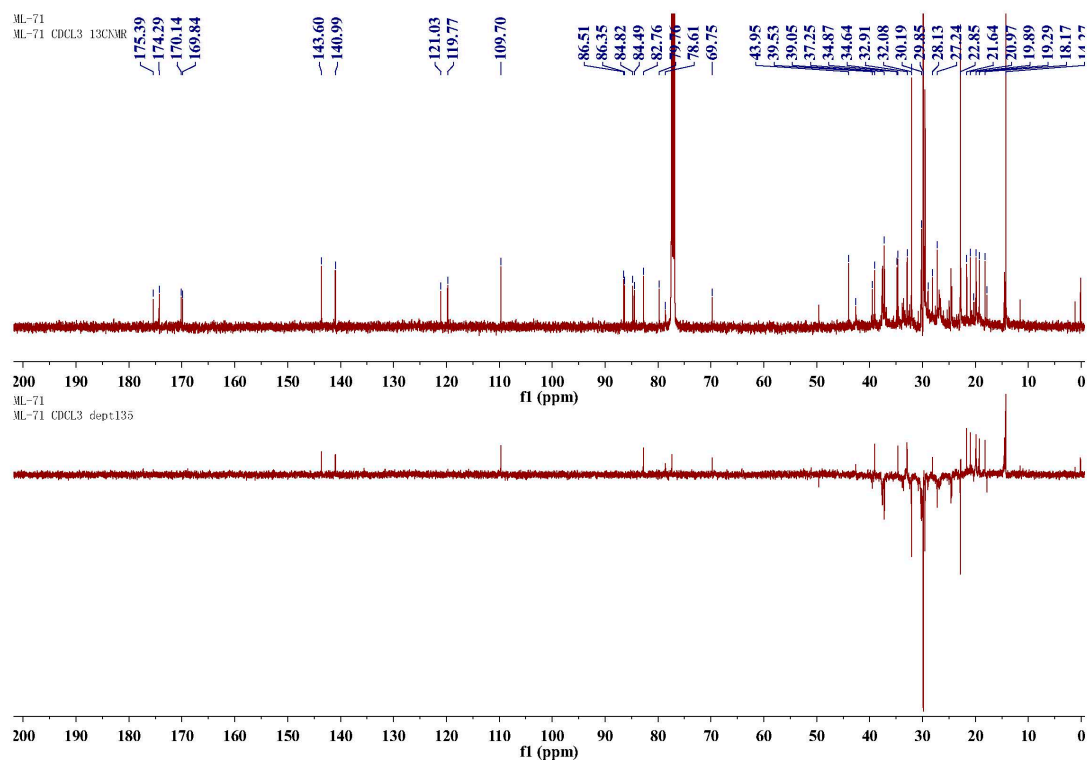

**Figure S9.** <sup>13</sup>C-NMR (125 MHz) and DEPT NMR spectrum of the new compound **2** in CDCl<sub>3</sub>.

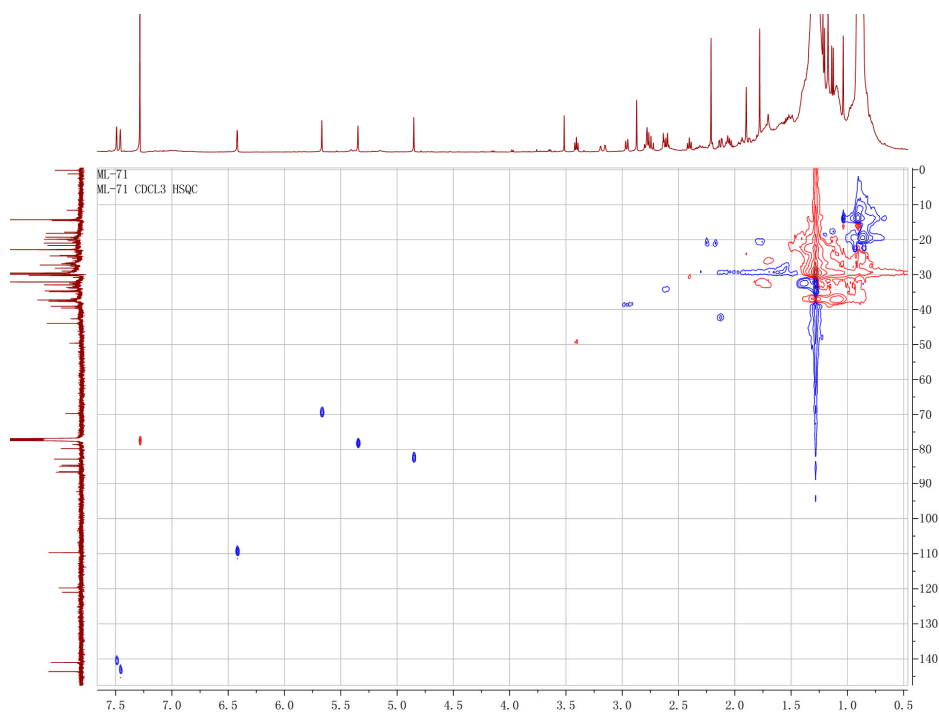

**Figure S10.** HSQC spectrum of the new compound **2** in CDCl<sub>3</sub>.

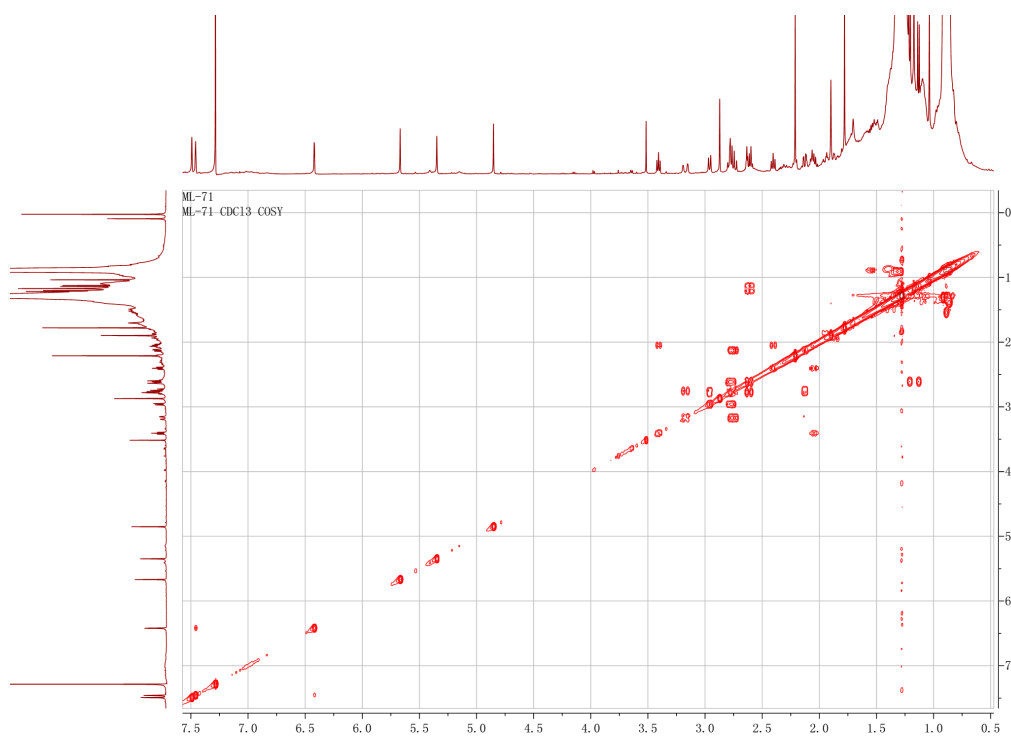

**Figure S11.**  $^1\text{H}$ - $^1\text{H}$  COSY spectrum of the new compound **2** in  $\text{CDCl}_3$ .

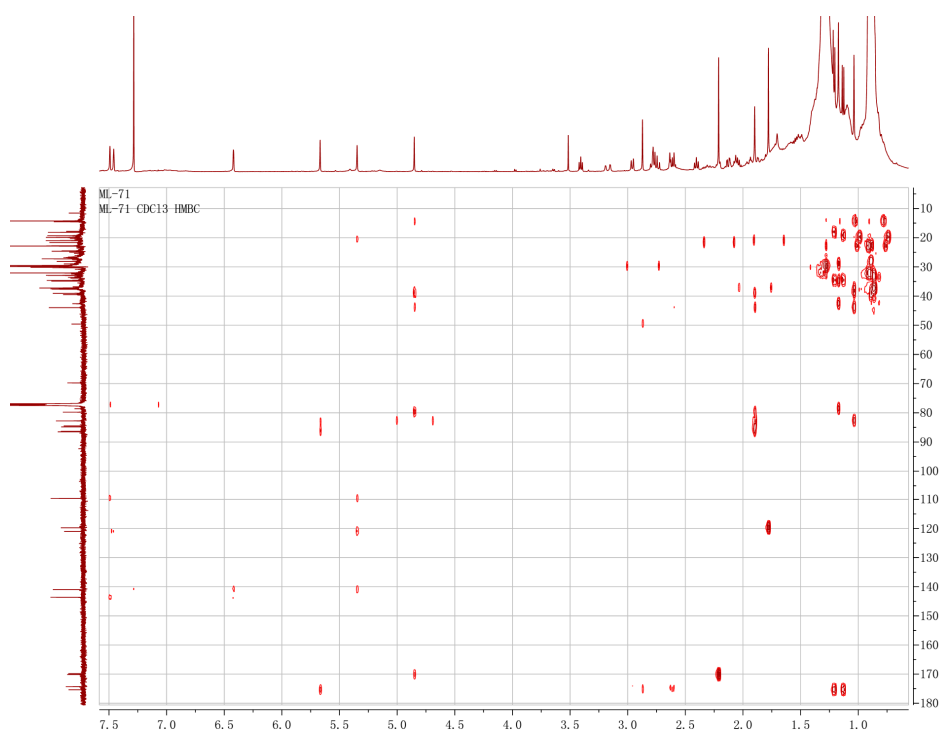

**Figure S12.** HMBC spectrum of the new compound **2** in  $\text{CDCl}_3$ .

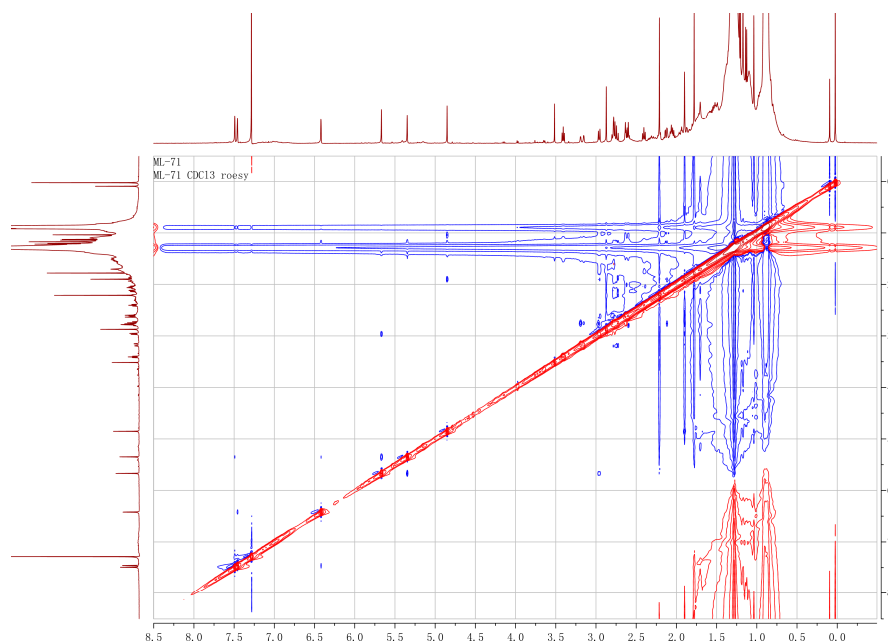

Figure S13. ROESY spectrum of the new compound 2 in CDCl<sub>3</sub>.

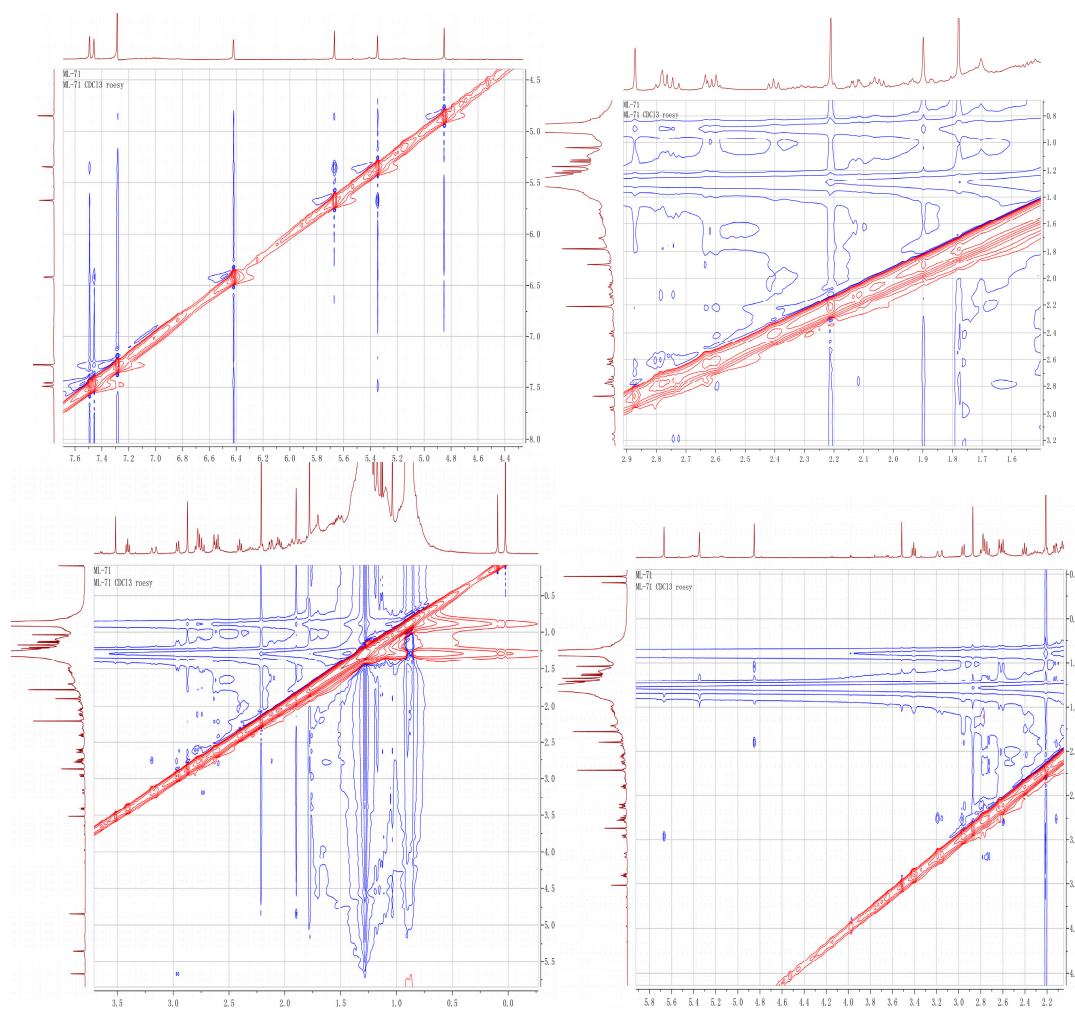

Figure S14. Partial enlarged ROESY spectra of compound 2 in CDCl<sub>3</sub>.

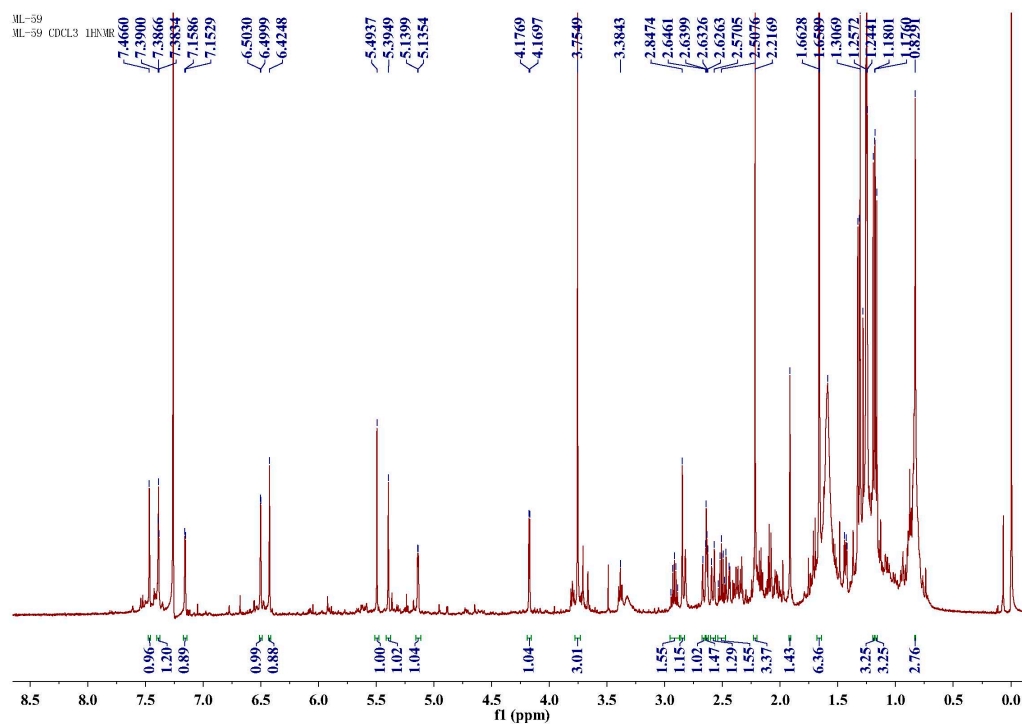

**Figure S15.** <sup>1</sup>H-NMR (500 MHz) spectrum of the new compound **3** in CDCl<sub>3</sub>.

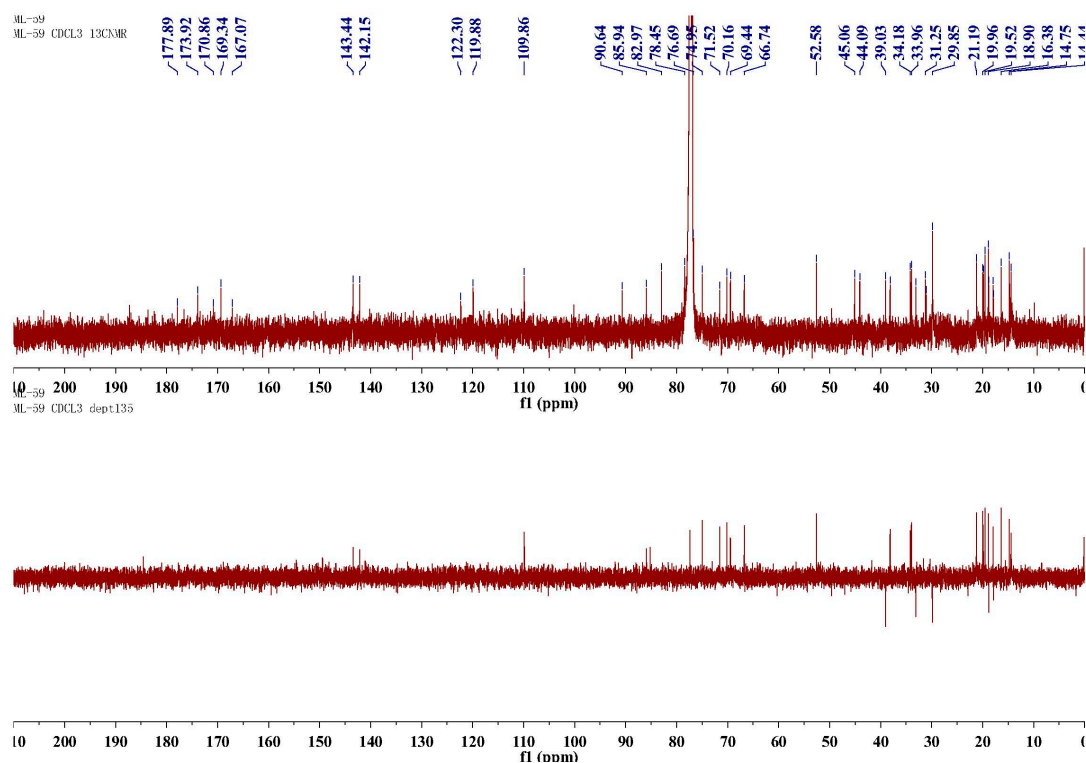

**Figure S16.** <sup>13</sup>C-NMR (125 MHz) and DEPT NMR spectrum of the new compound **3** in CDCl<sub>3</sub>.

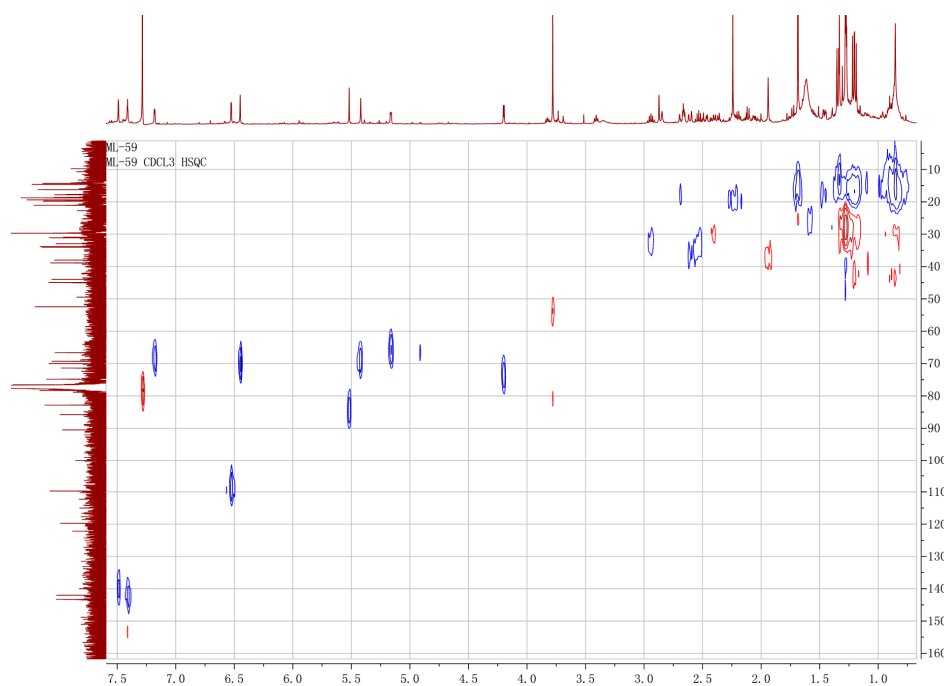

Figure S17. HSQC spectrum of the new compound 3 in  $\text{CDCl}_3$ .

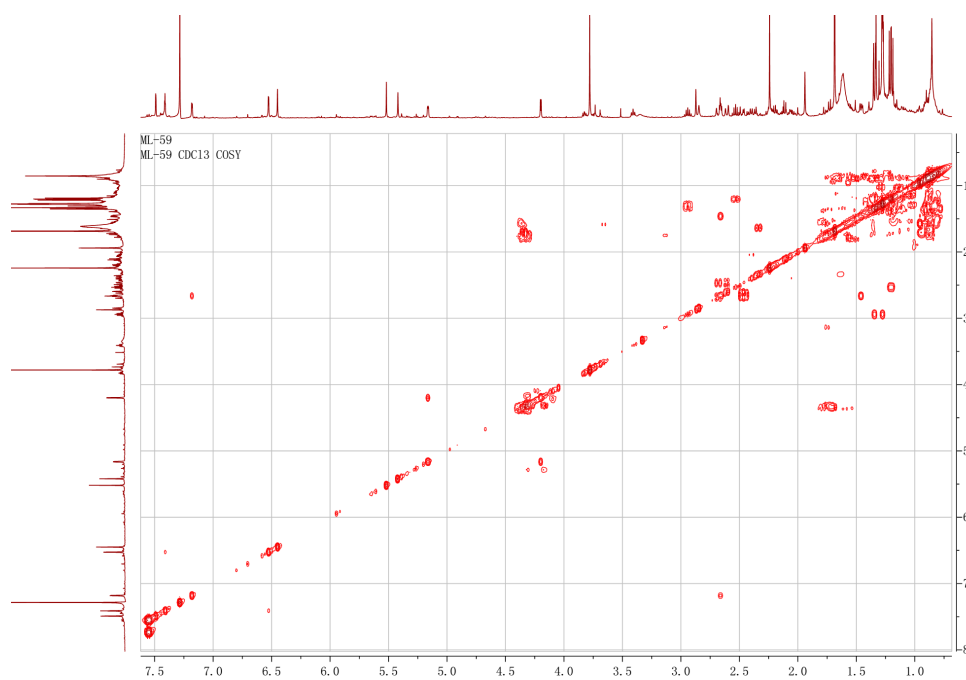

Figure S18.  $^1\text{H}$ - $^1\text{H}$  COSY spectrum of the new compound 3 in  $\text{CDCl}_3$ .

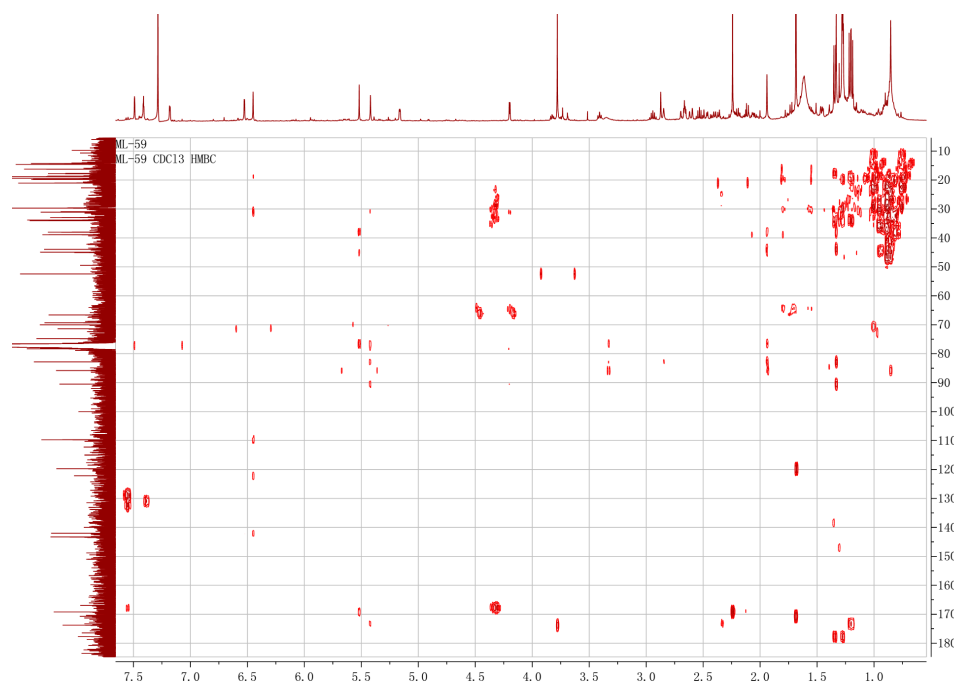

Figure S19. HMBC spectrum of the new compound 3 in  $\text{CDCl}_3$ .

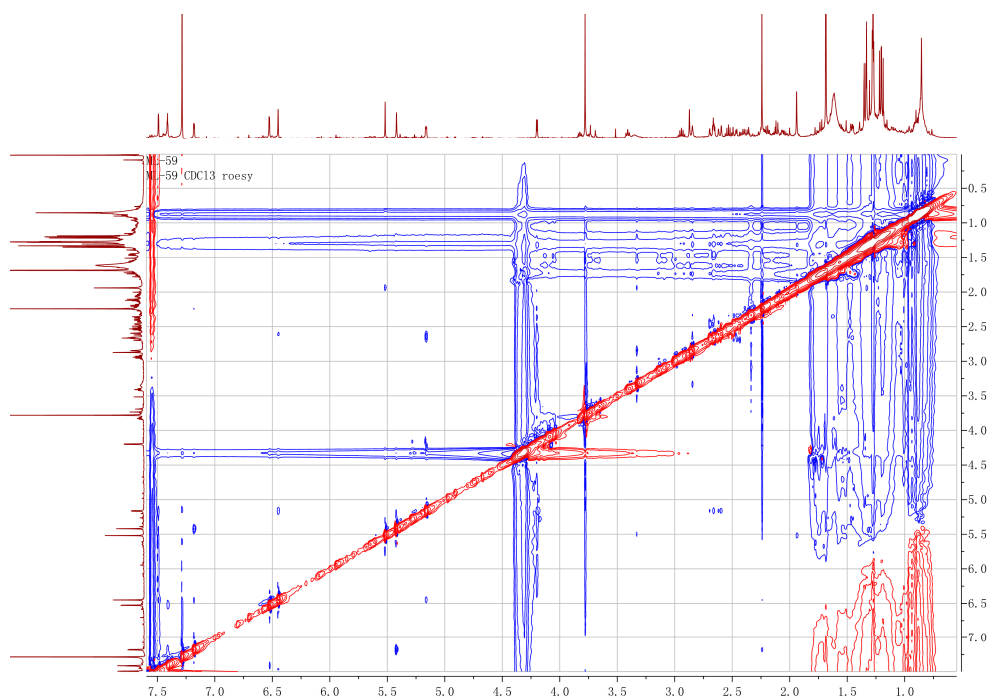

Figure S20. ROESY spectrum of the new compound 3 in  $\text{CDCl}_3$ .



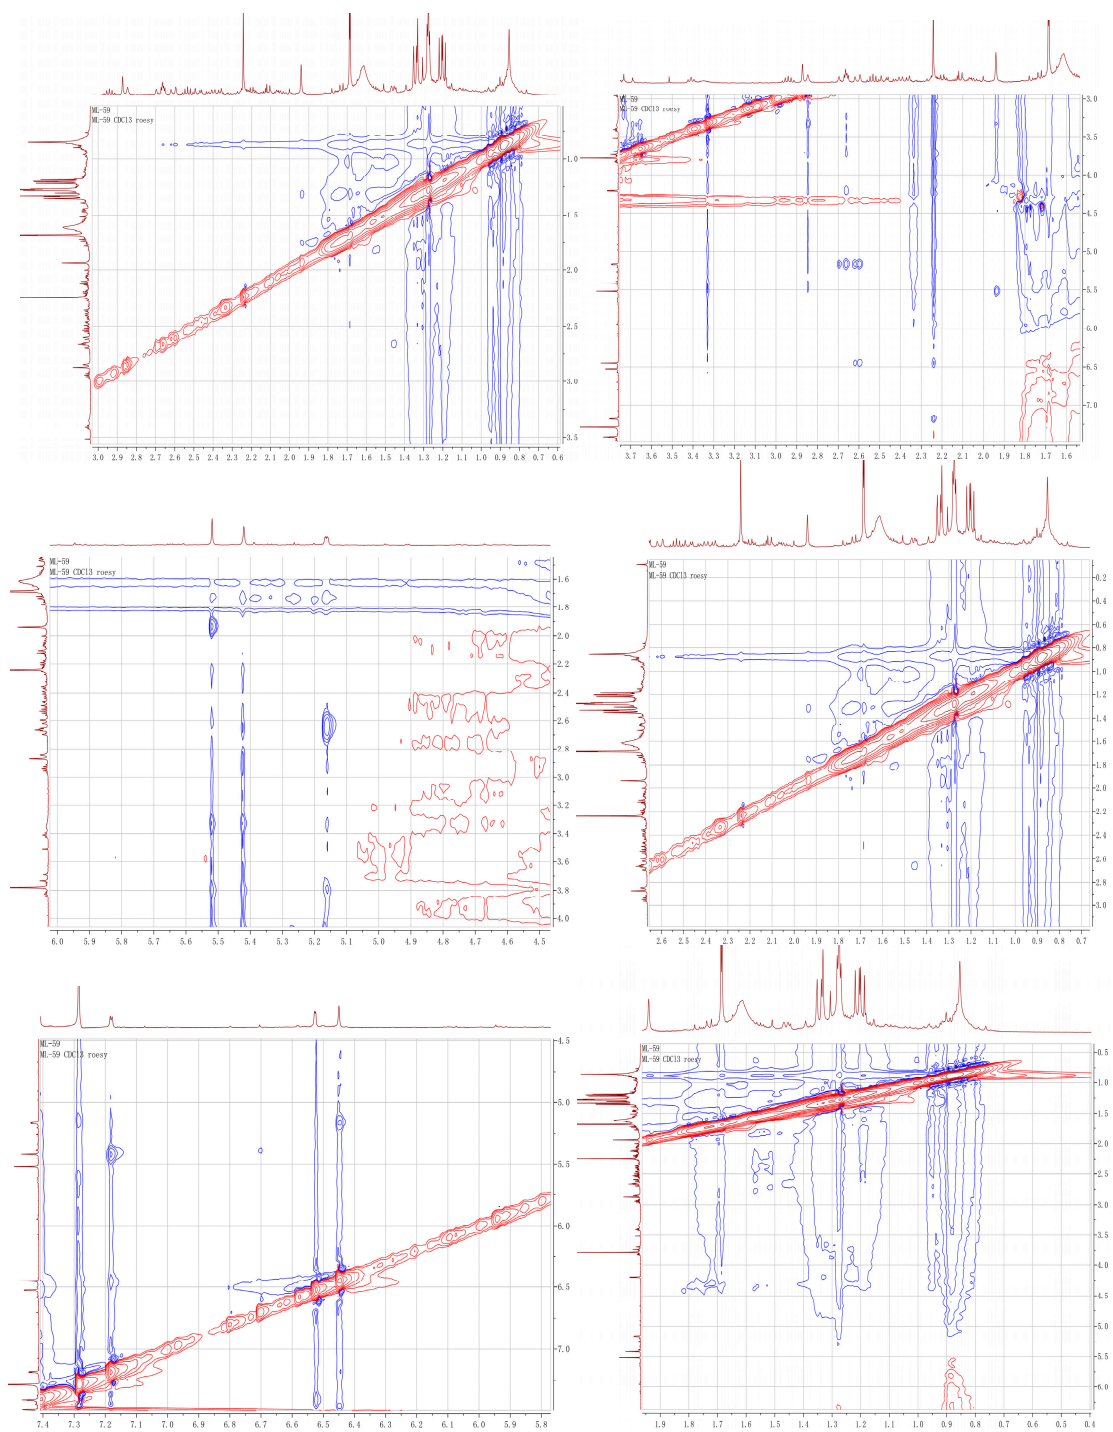

**Figure S21.** Partial enlarged ROESY spectra of compound 3 in CDCl<sub>3</sub>.

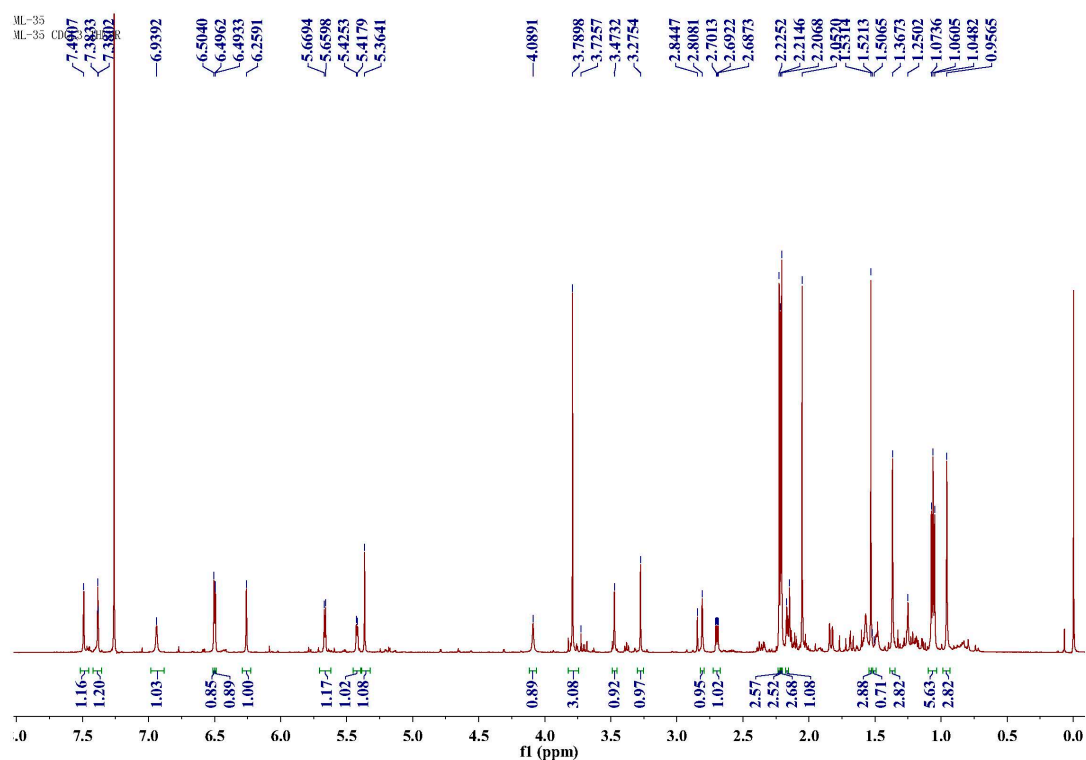

Figure S22.  $^1\text{H}$ -NMR (500 MHz) spectrum of the new compound **4** in  $\text{CDCl}_3$ .

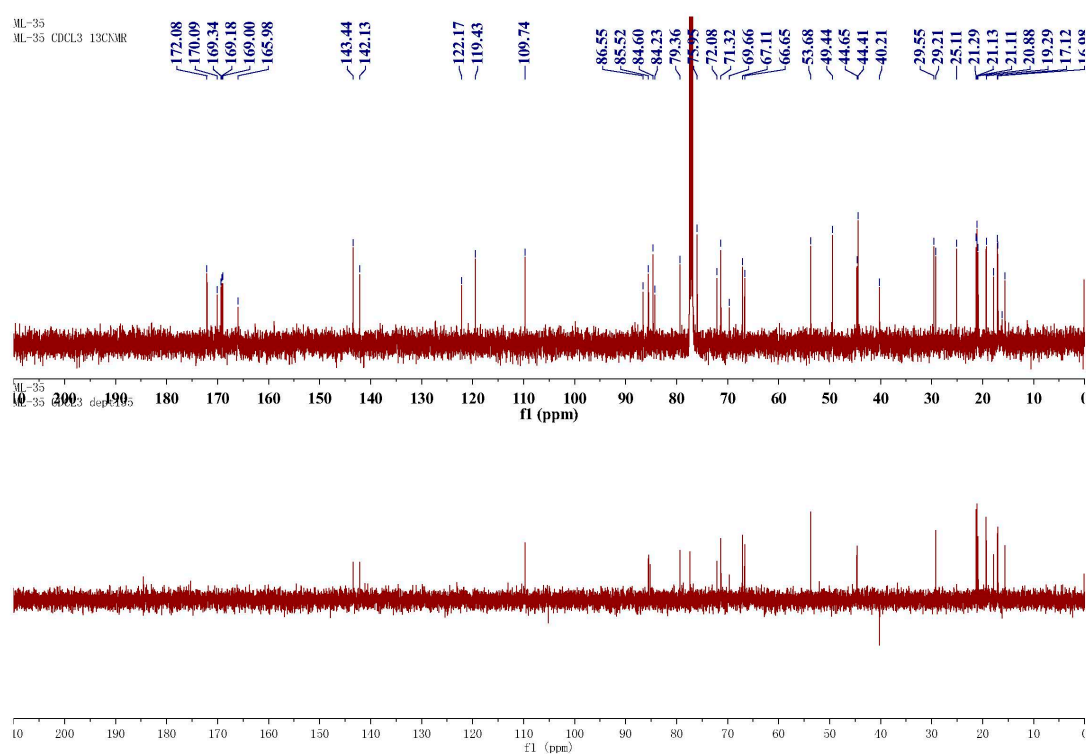

Figure S23.  $^{13}\text{C}$ -NMR (125 MHz) and DEPT NMR spectrum of the new compound **4** in  $\text{CDCl}_3$ .

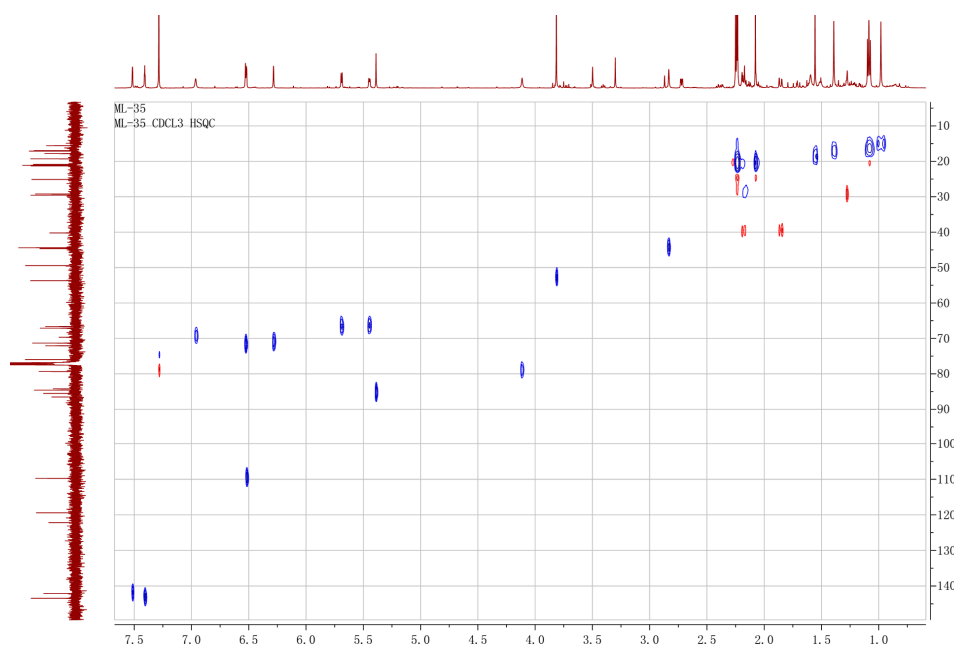

Figure S24. HSQC spectrum of the new compound 4 in  $\text{CDCl}_3$ .

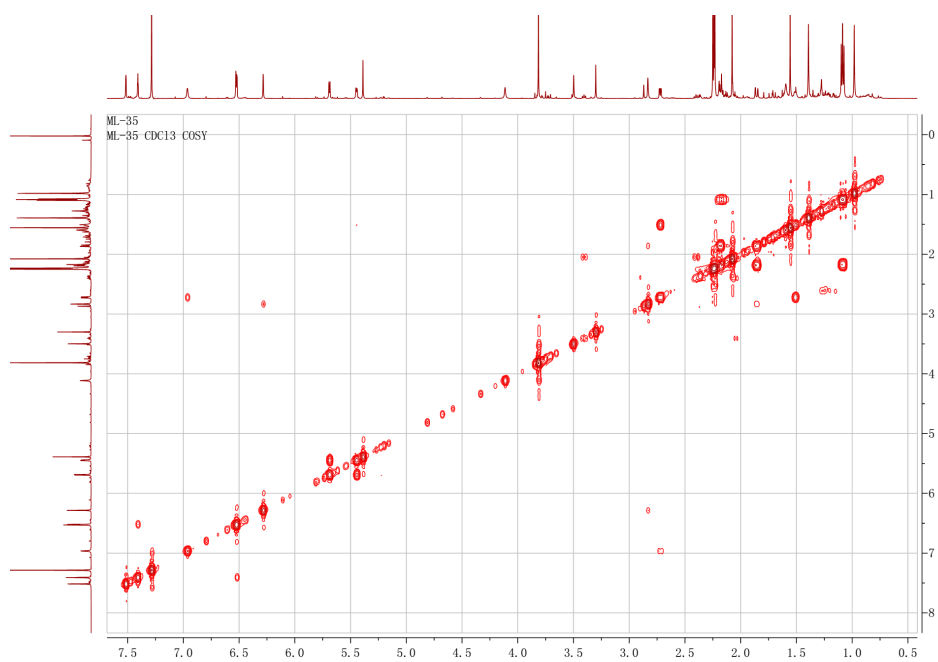

Figure S25.  $^1\text{H}$ - $^1\text{H}$  COSY spectrum of the new compound 4 in  $\text{CDCl}_3$ .

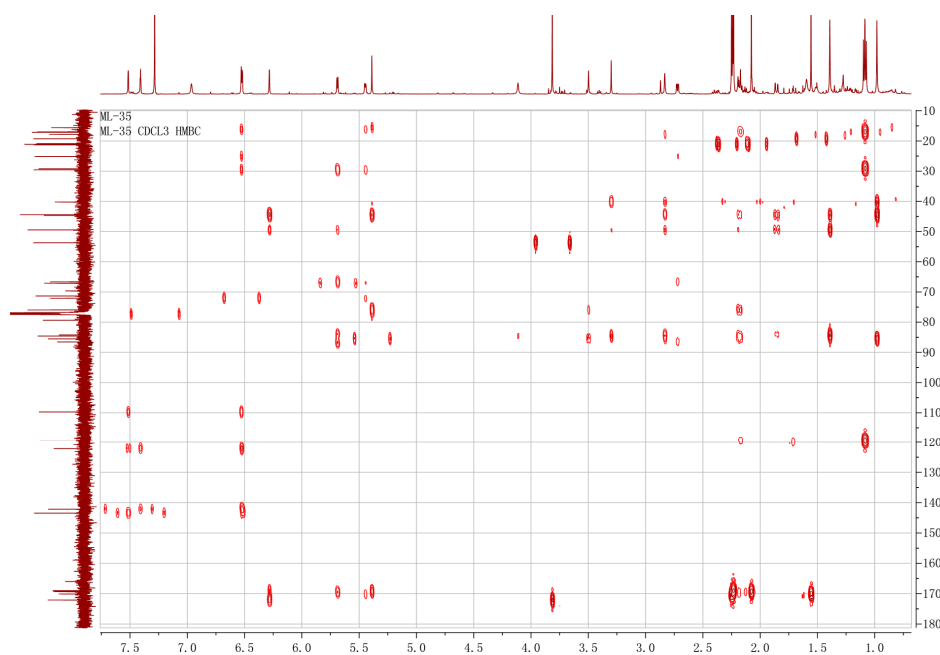

Figure S26. HMBC spectrum of the new compound 4 in CDCl<sub>3</sub>.

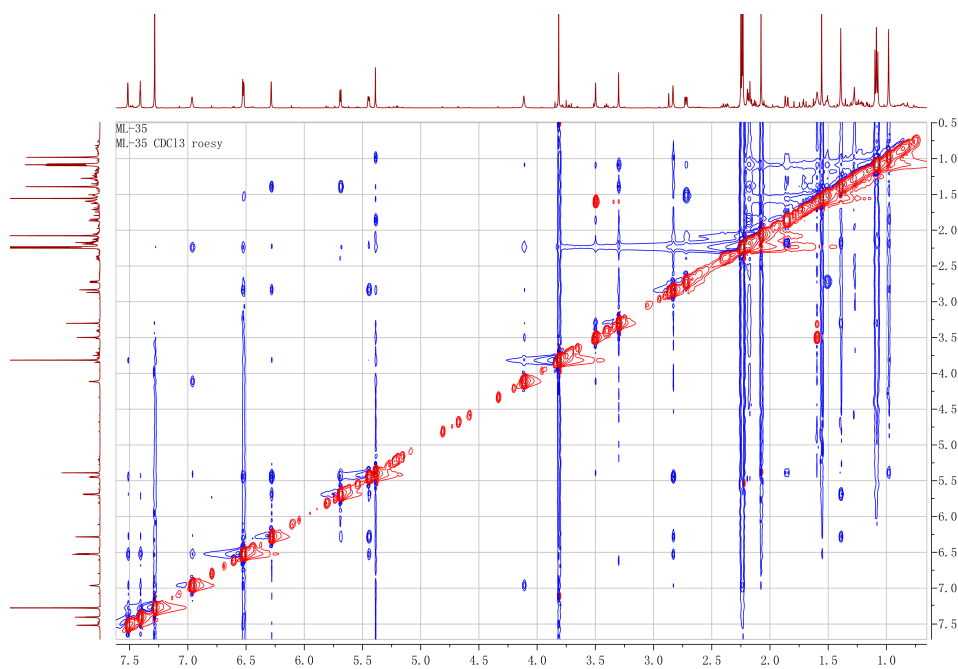

Figure S27. ROESY spectrum of the new compound 4 in CDCl<sub>3</sub>.

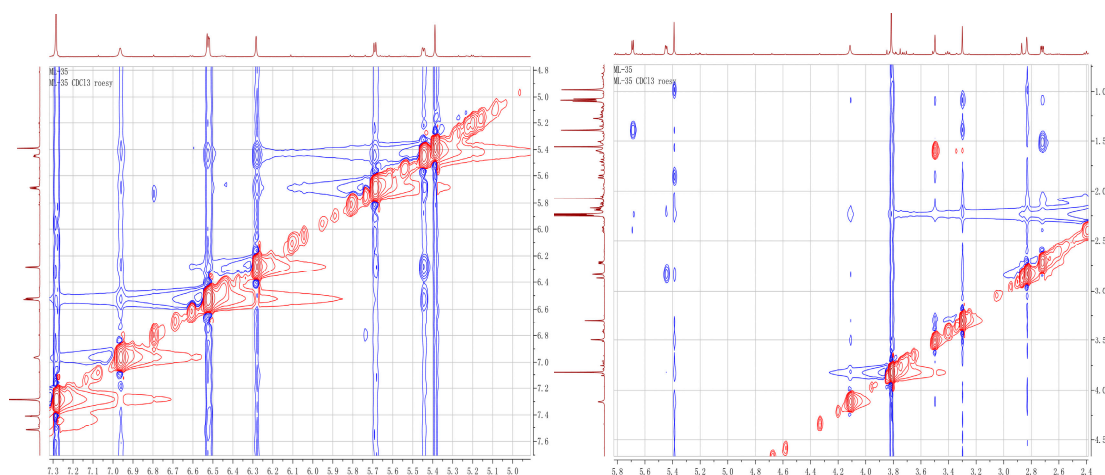

Figure S28. Partial enlarged ROESY spectra of compound 4 in CDCl<sub>3</sub>.

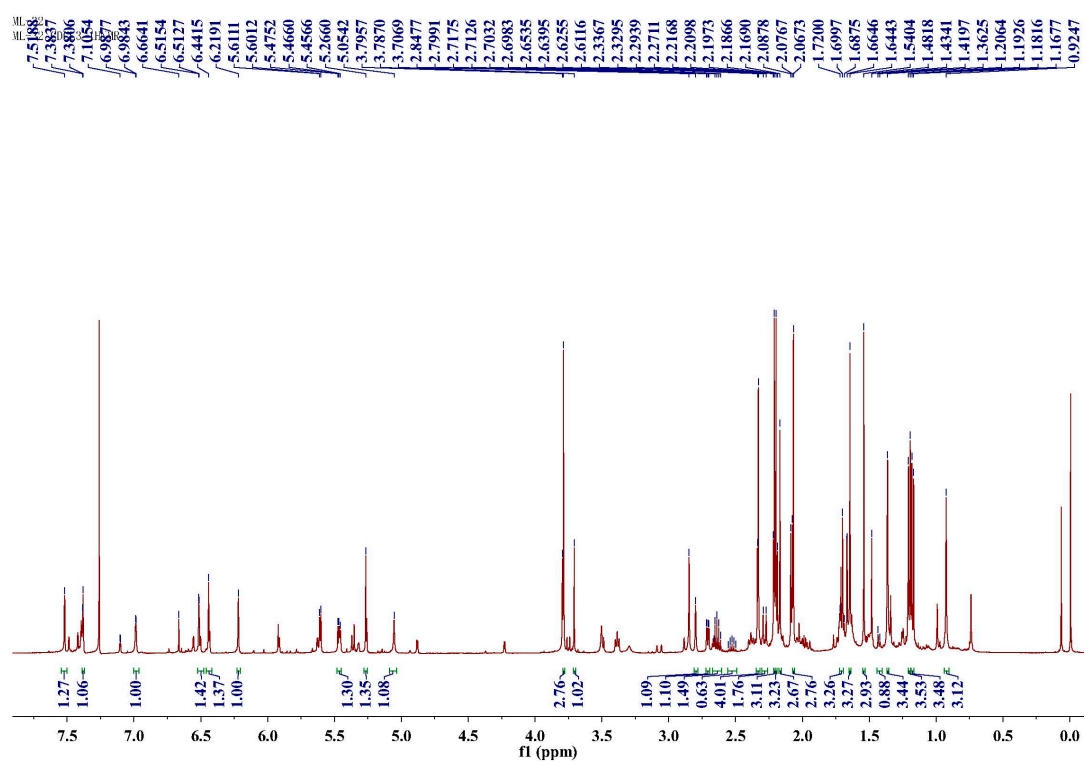

Figure S29. <sup>1</sup>H-NMR (500 MHz) spectrum of the new compound 5 in CDCl<sub>3</sub>.

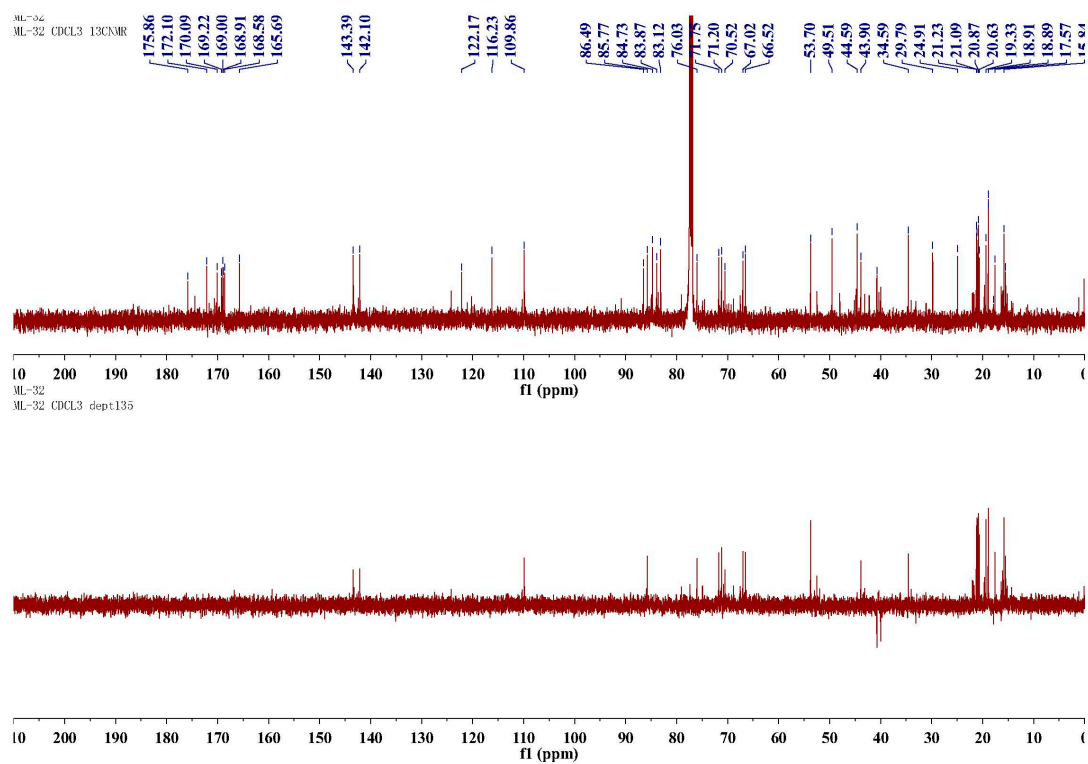

Figure S30.  $^{13}\text{C}$ -NMR (125 MHz) and DEPT NMR spectrum of the new compound 5 in  $\text{CDCl}_3$ .

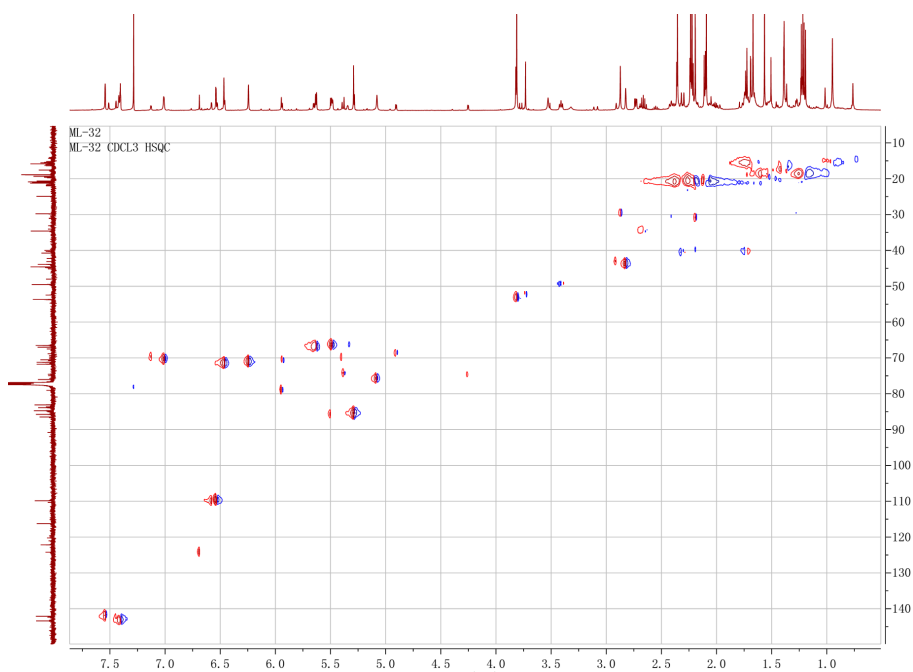

Figure S31. HSQC spectrum of the new compound 5 in  $\text{CDCl}_3$ .

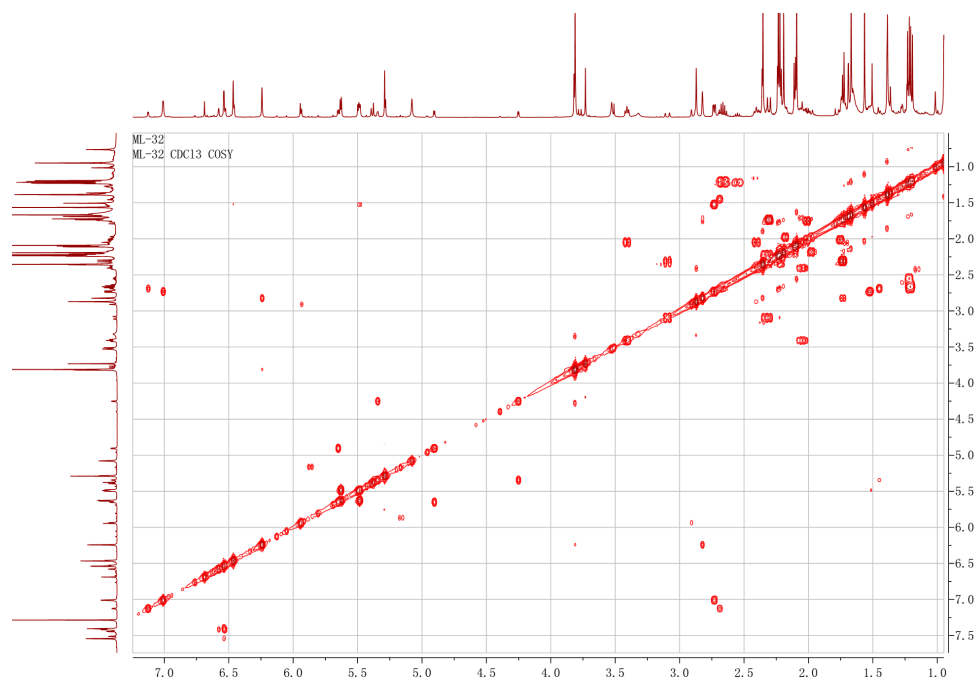

**Figure S32.**  $^1\text{H}$ - $^1\text{H}$  COSY spectrum of the new compound **5** in  $\text{CDCl}_3$ .

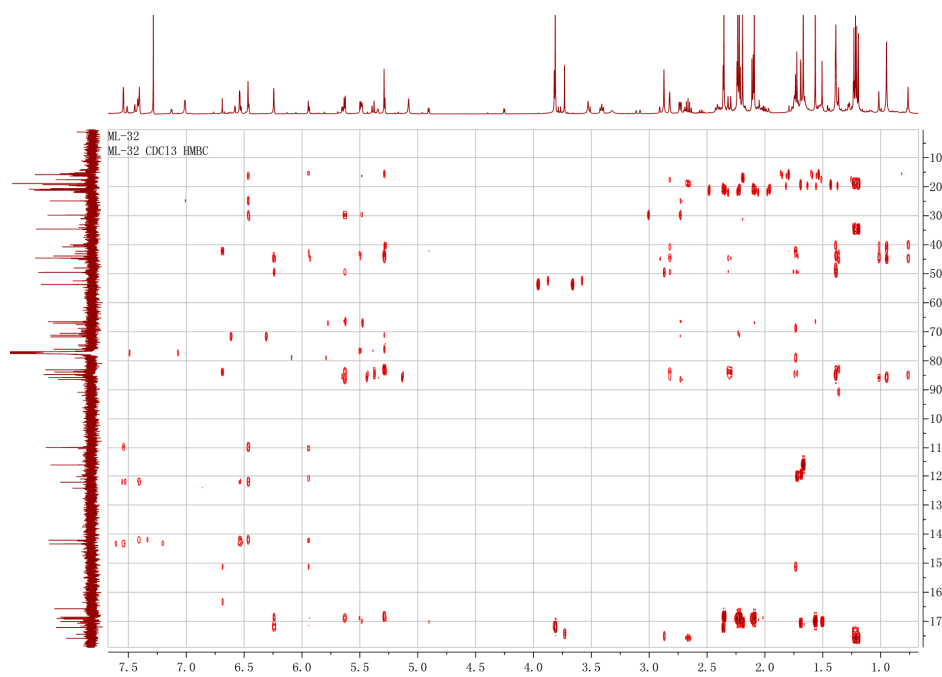

**Figure S33.** HMBC spectrum of the new compound **5** in  $\text{CDCl}_3$ .

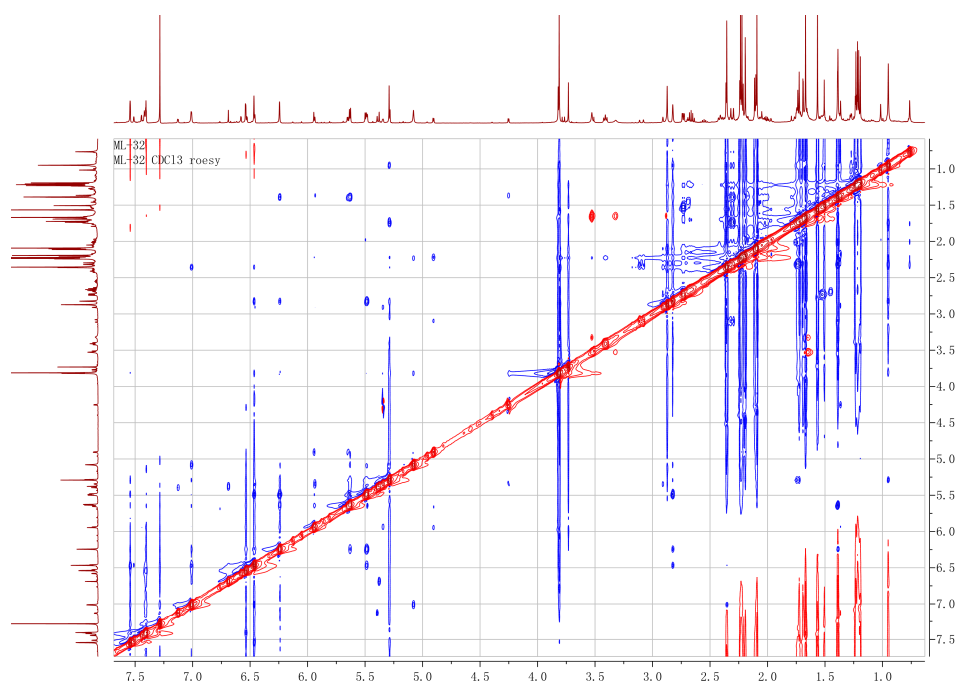

Figure S34. ROESY spectrum of the new compound **5** in CDCl<sub>3</sub>.

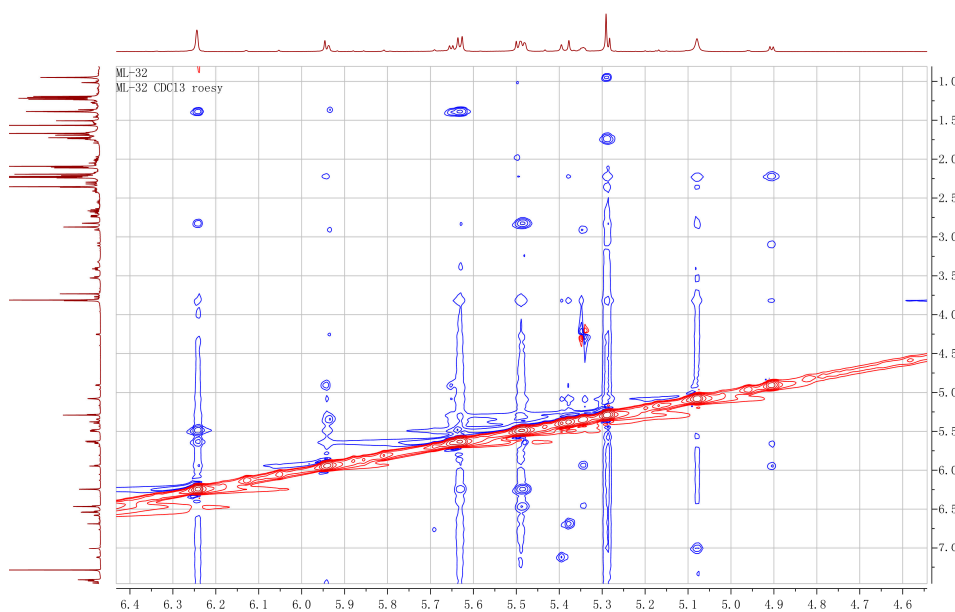

Figure S35. Cont.



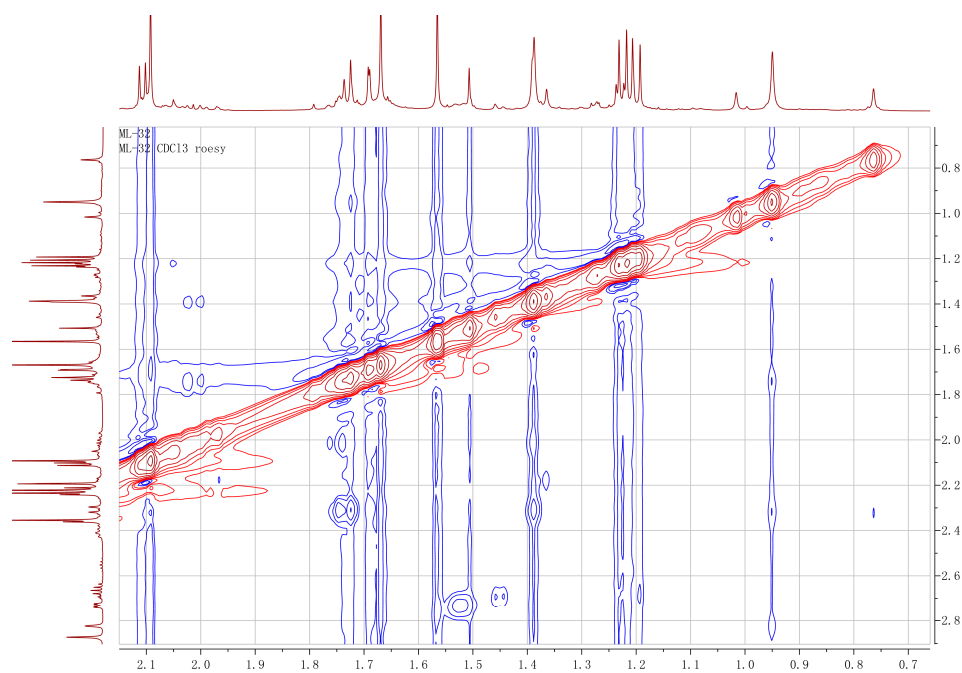

**Figure S35.** Partial enlarged ROESY spectra of compound **5** in CDCl<sub>3</sub>.

## Qualitative Analysis Report

|                               |              |                      |                      |
|-------------------------------|--------------|----------------------|----------------------|
| <b>Data Filename</b>          | ML-13.d      | <b>Sample Name</b>   | ML-13                |
| <b>Sample Type</b>            | Sample       | <b>Position</b>      | P1-F7                |
| <b>Instrument Name</b>        | Instrument 1 | <b>User Name</b>     |                      |
| <b>Acq Method</b>             | SIBU.m       | <b>Acquired Time</b> | 7/29/2015 5:59:38 PM |
| <b>IRM Calibration Status</b> | Success      | <b>DA Method</b>     | Default.m            |
| <b>Comment</b>                |              |                      |                      |

|                       |                             |              |
|-----------------------|-----------------------------|--------------|
| <b>Sample Group</b>   |                             | <b>Info.</b> |
| <b>Acquisition SW</b> | 6200 series TOF/6500 series |              |
| <b>Version</b>        | Q-TOF B.05.01 (B5125.2)     |              |

### User Spectra

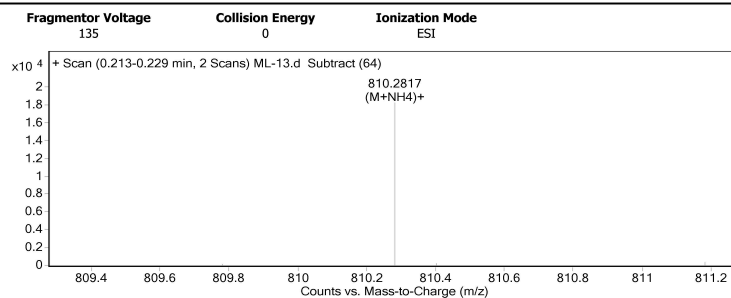

### Peak List

| <i>m/z</i> | <i>z</i> | Abund    | Formula     | Ion      |
|------------|----------|----------|-------------|----------|
| 318.3011   |          | 16140.07 |             |          |
| 453.1673   | 1        | 19408.77 |             |          |
| 460.2691   | 1        | 21296.88 |             |          |
| 810.2817   | 1        | 18257.66 | C37 H44 O19 | (M+NH4)+ |
| 815.2368   | 1        | 38883.53 |             |          |
| 816.2404   | 1        | 16098.89 |             |          |
| 831.2107   | 1        | 15305.69 |             |          |
| 861.3651   | 1        | 22889.48 |             |          |

### Formula Calculator Element Limits

| Element | Min | Max |
|---------|-----|-----|
| C       | 3   | 60  |
| H       | 0   | 120 |
| O       | 0   | 30  |

### Formula Calculator Results

| Formula     | CalculatedMass | CalculatedMz | Mz       | Diff. (mDa) | Diff. (ppm) | DBE     |
|-------------|----------------|--------------|----------|-------------|-------------|---------|
| C37 H44 O19 | 792.2477       | 810.2815     | 810.2817 | -0.1        | -0.1        | 16.0000 |

--- End Of Report ---

**Figure S36.** HR-ESI-MS spectrum of the new compound 1.

## Qualitative Analysis Report

|                               |              |                      |                      |
|-------------------------------|--------------|----------------------|----------------------|
| <b>Data Filename</b>          | ML-71.d      | <b>Sample Name</b>   | ML-71                |
| <b>Sample Type</b>            | Sample       | <b>Position</b>      | P1-B9                |
| <b>Instrument Name</b>        | Instrument 1 | <b>User Name</b>     |                      |
| <b>Acq Method</b>             | SIBU.m       | <b>Acquired Time</b> | 8/27/2015 3:25:11 PM |
| <b>IRM Calibration Status</b> | Success      | <b>DA Method</b>     | Default.m            |
| <b>Comment</b>                |              |                      |                      |

|                       |                             |              |
|-----------------------|-----------------------------|--------------|
| <b>Sample Group</b>   |                             | <b>Info.</b> |
| <b>Acquisition SW</b> | 6200 series TOF/6500 series |              |
| <b>Version</b>        | Q-TOF B.05.01 (B5125.2)     |              |

### User Spectra

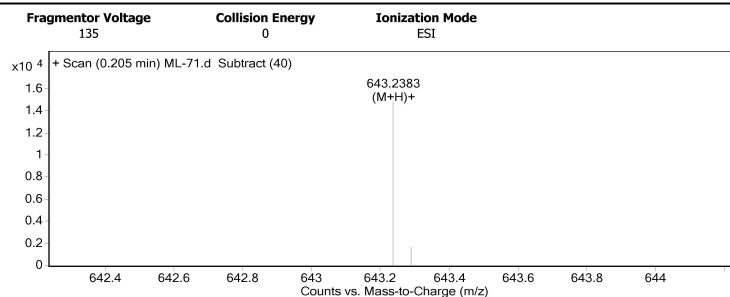

### Peak List

| m/z      | z | Abund    | Formula     | Ion    |
|----------|---|----------|-------------|--------|
| 318.3001 |   | 27773.34 |             |        |
| 415.2115 |   | 16415.18 |             |        |
| 432.238  |   | 15571.8  |             |        |
| 437.1935 | 1 | 20423.27 |             |        |
| 453.1673 | 1 | 54216.02 |             |        |
| 454.1704 | 1 | 13927.89 |             |        |
| 460.2691 | 1 | 28567.01 |             |        |
| 643.2383 | 1 | 14764.36 | C33 H38 O13 | (M+H)+ |

### Formula Calculator Element Limits

| Element | Min | Max |
|---------|-----|-----|
| C       | 3   | 60  |
| H       | 0   | 120 |
| O       | 0   | 30  |

### Formula Calculator Results

| Formula     | CalculatedMass | CalculatedMz | Mz       | Diff. (mDa) | Diff. (ppm) | DBE     |
|-------------|----------------|--------------|----------|-------------|-------------|---------|
| C33 H38 O13 | 642.2312       | 643.2385     | 643.2383 | 0.1         | 0.2         | 15.0000 |

--- End Of Report ---

**Figure S37.** HR-ESI-MS spectrum of the new compound 2.

## Qualitative Analysis Report

|                        |              |               |                      |
|------------------------|--------------|---------------|----------------------|
| Data Filename          | ML-59.d      | Sample Name   | ML-59                |
| Sample Type            | Sample       | Position      | P1-B7                |
| Instrument Name        | Instrument 1 | User Name     |                      |
| Acq Method             | SIBU.m       | Acquired Time | 8/27/2015 3:22:12 PM |
| IRM Calibration Status | Success      | DA Method     | Default.m            |
| Comment                |              |               |                      |

|                |                             |       |  |
|----------------|-----------------------------|-------|--|
| Sample Group   |                             | Info. |  |
| Acquisition SW | 6200 series TOF/6500 series |       |  |
| Version        | Q-TOF B.05.01 (B5125.2)     |       |  |

### User Spectra

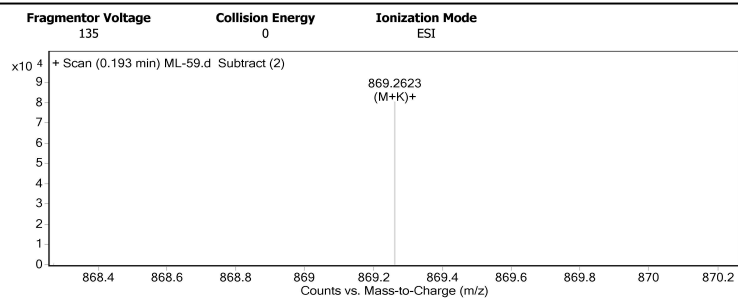

#### Peak List

| m/z      | z | Abund    | Formula     | Ion    |
|----------|---|----------|-------------|--------|
| 274.2734 | 1 | 24594.75 |             |        |
| 318.2999 | 1 | 25627.38 |             |        |
| 453.167  | 1 | 20425.79 |             |        |
| 848.3333 | 1 | 36407.78 |             |        |
| 849.3373 | 1 | 17635.67 |             |        |
| 853.2882 | 1 | 23147.75 |             |        |
| 869.2623 | 1 | 80176.62 | C41 H50 O18 | (M+K)+ |
| 870.2657 | 1 | 37090.45 | C41 H50 O18 | (M+K)+ |

#### Formula Calculator Element Limits

| Element | Min | Max |
|---------|-----|-----|
| C       | 3   | 60  |
| H       | 0   | 120 |
| O       | 0   | 30  |

#### Formula Calculator Results

| Formula     | CalculatedMass | CalculatedMz | Mz       | Diff. (mDa) | Diff. (ppm) | DBE     |
|-------------|----------------|--------------|----------|-------------|-------------|---------|
| C41 H50 O18 | 830.2997       | 869.2629     | 869.2623 | 0.5         | 0.6         | 17.0000 |

--- End Of Report ---

**Figure S38.** HR-ESI-MS spectrum of the new compound 3.

## Qualitative Analysis Report

|                               |              |                      |                      |
|-------------------------------|--------------|----------------------|----------------------|
| <b>Data Filename</b>          | ML-35.d      | <b>Sample Name</b>   | ML-35                |
| <b>Sample Type</b>            | Sample       | <b>Position</b>      | P1-F9                |
| <b>Instrument Name</b>        | Instrument 1 | <b>User Name</b>     |                      |
| <b>Acq Method</b>             | SIBU.m       | <b>Acquired Time</b> | 7/29/2015 6:02:35 PM |
| <b>IRM Calibration Status</b> | Success      | <b>DA Method</b>     | Default.m            |
| <b>Comment</b>                |              |                      |                      |

|                       |                             |              |
|-----------------------|-----------------------------|--------------|
| <b>Sample Group</b>   |                             | <b>Info.</b> |
| <b>Acquisition SW</b> | 6200 series TOF/6500 series |              |
| <b>Version</b>        | Q-TOF B.05.01 (B5125.2)     |              |

### User Spectra

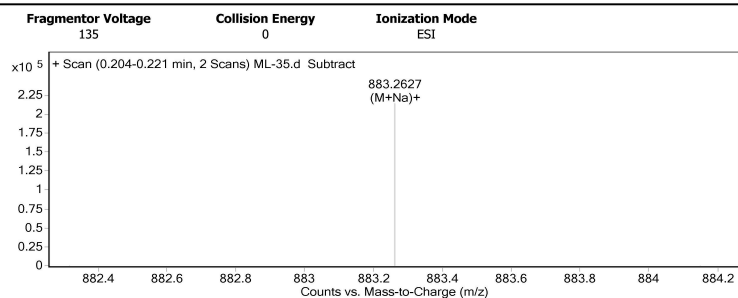

### Peak List

| m/z      | z | Abund     | Formula     | Ion     |
|----------|---|-----------|-------------|---------|
| 878.3071 | 1 | 51829.38  |             |         |
| 883.2627 | 1 | 214023.44 | C41 H48 O20 | (M+Na)+ |
| 884.2661 | 1 | 93895.03  | C41 H48 O20 | (M+Na)+ |
| 885.2679 | 1 | 28165.18  | C41 H48 O20 | (M+Na)+ |
| 899.2366 | 1 | 148595.5  |             |         |
| 900.2401 | 1 | 65833.95  |             |         |
| 901.2405 | 1 | 29051.7   |             |         |
| 906.3387 | 1 | 22616.06  |             |         |

### Formula Calculator Element Limits

| Element | Min | Max |
|---------|-----|-----|
| C       | 3   | 60  |
| H       | 0   | 120 |
| O       | 0   | 30  |

### Formula Calculator Results

| Formula     | CalculatedMass | CalculatedMz | Mz       | Diff. (mDa) | Diff. (ppm) | DBE     |
|-------------|----------------|--------------|----------|-------------|-------------|---------|
| C41 H48 O20 | 860.2739       | 883.2631     | 883.2627 | 0.5         | 0.6         | 18.0000 |

--- End Of Report ---

**Figure S39.** HR-ESI-MS spectrum of the new compound **4**.

## Qualitative Analysis Report

|                               |              |                      |                      |
|-------------------------------|--------------|----------------------|----------------------|
| <b>Data Filename</b>          | ML-32.d      | <b>Sample Name</b>   | ML-32                |
| <b>Sample Type</b>            | Sample       | <b>Position</b>      | P1-F8                |
| <b>Instrument Name</b>        | Instrument 1 | <b>User Name</b>     |                      |
| <b>Acq Method</b>             | SIBU.m       | <b>Acquired Time</b> | 7/29/2015 6:01:08 PM |
| <b>IRM Calibration Status</b> | Success      | <b>DA Method</b>     | Default.m            |
| <b>Comment</b>                |              |                      |                      |

|                       |                             |              |
|-----------------------|-----------------------------|--------------|
| <b>Sample Group</b>   |                             | <b>Info.</b> |
| <b>Acquisition SW</b> | 6200 series TOF/6500 series |              |
| <b>Version</b>        | Q-TOF B.05.01 (B5125.2)     |              |

### User Spectra

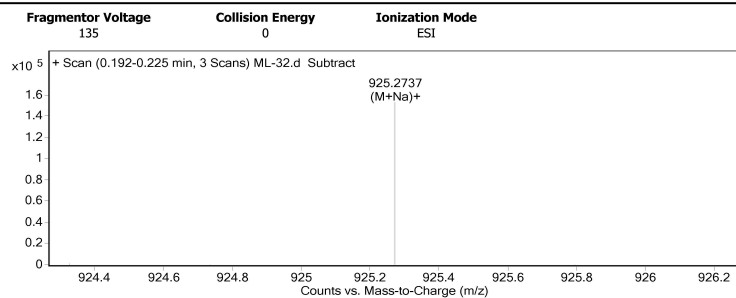

### Peak List

| m/z      | z | Abund     | Formula     | Ion     |
|----------|---|-----------|-------------|---------|
| 899.2368 | 1 | 67953.05  |             |         |
| 900.2403 | 1 | 31764.8   |             |         |
| 920.3182 | 1 | 63077.2   |             |         |
| 921.3218 | 1 | 28484.12  |             |         |
| 925.2737 | 1 | 152962.28 | C43 H50 O21 | (M+Na)+ |
| 926.2772 | 1 | 67624.54  | C43 H50 O21 | (M+Na)+ |
| 941.2477 | 1 | 106957.15 |             |         |
| 942.2508 | 1 | 51154.05  |             |         |

### Formula Calculator Element Limits

| Element | Min | Max |
|---------|-----|-----|
| C       | 3   | 60  |
| H       | 0   | 120 |
| O       | 0   | 30  |

### Formula Calculator Results

| Formula     | CalculatedMass | CalculatedMz | Mz       | Diff. (mDa) | Diff. (ppm) | DBE     |
|-------------|----------------|--------------|----------|-------------|-------------|---------|
| C43 H50 O21 | 902.2845       | 925.2737     | 925.2737 | 0.0         | 0.0         | 19.0000 |

--- End Of Report ---

**Figure S40.** HR-ESI-MS spectrum of the new compound 5.
